1           **Integrated scRNA-seq analysis identifies conserved transcriptomic features of**  
2           **mononuclear phagocytes in mouse and human atherosclerosis**

3 Alma Zernecke<sup>1</sup>✉, Florian Erhard<sup>2</sup>, Tobias Weinberger<sup>3,4</sup>, Christian Schulz<sup>3,4</sup>, Klaus Ley<sup>5,6</sup>,  
4 Antoine-Emmanuel Saliba<sup>7</sup>, Clément Cochain<sup>1,8</sup>✉

5 <sup>1</sup>Institute of Experimental Biomedicine, University Hospital Würzburg, Würzburg, Germany

6 <sup>2</sup>Institute for Virology and Immunobiology, Julius-Maximilians-University Würzburg, Würzburg,  
7 Germany

8 <sup>3</sup>Medizinische Klinik und Poliklinik I, Klinikum der Universität, Ludwig-Maximilians-Universität,  
9 Munich, Germany

10 <sup>4</sup>DZHK (German Centre for Cardiovascular Research), partner site Munich Heart Alliance,  
11 Munich, Germany

12 <sup>5</sup>La Jolla Institute for Immunology, CA, USA

13 <sup>6</sup>Department of Bioengineering, University of California, San Diego, USA

14 <sup>7</sup>Helmholtz Institute for RNA-based Infection Research (HIRI), Helmholtz-Center for Infection  
15 Research (HZI), Würzburg, Germany

16 <sup>8</sup>University Hospital Würzburg, Germany; Comprehensive Heart Failure Center, Würzburg,  
17 Germany, Würzburg, Germany

18

19 Correspondence to:

20 Clément Cochain: [Cochain\\_C@ukw.de](mailto:Cochain_C@ukw.de)

21 Alma Zernecke: [Zernecke\\_A@ukw.de](mailto:Zernecke_A@ukw.de)

22 Keywords: macrophage; atherosclerosis; single-cell RNA-seq

23 Short title: Macrophages in mouse and human atherosclerosis

24 Total word count: 9,177

25 **Abstract**

26 **Rationale-** Accumulation of mononuclear phagocytes (monocytes, macrophages and dendritic  
27 cells) in the vessel wall is a hallmark of atherosclerosis. Although single-cell RNA-sequencing  
28 (scRNA-seq) has shed new light on immune cell transcriptional diversity in atherosclerosis, it  
29 is still unknown whether the transcriptional states of mononuclear phagocytes are conserved  
30 between mouse and human atherosclerosis.

31 **Objective-** To integrate and compare macrophage and dendritic cell transcriptomes in mouse  
32 and human atherosclerosis.

33 **Methods and results-** We integrated 12 scRNA-seq datasets of immune cells isolated from  
34 healthy or atherosclerotic mouse aortas, and scRNA-seq data from 11 patients (n=4 coronary  
35 vessels, n=7 carotid endarterectomy specimens) from two independent studies. Integration of  
36 mouse data recovered previously described macrophage populations and identified novel  
37 subpopulations with discrete transcriptomic signatures within populations of aortic resident  
38 (*Lyve1*), inflammatory (*Il1b*), as well as foamy (*Trem2<sup>hi</sup>*) macrophages. We identified unique  
39 transcriptomic features distinguishing aortic intimal resident macrophages from  
40 atherosclerosis-associated *Trem2<sup>hi</sup>* macrophages. Also, populations of *Xcr1<sup>+</sup>* type 1 classical  
41 dendritic cells (cDC1), *Cd209a<sup>+</sup>* cDC2 and mature DCs (*Ccr7*, *Fscn1*) were detected. In  
42 humans, we uncovered macrophage and dendritic cell populations with gene expression  
43 patterns similar to those observed in mice in both vascular beds. In particular, core transcripts  
44 of the foamy/*Trem2<sup>hi</sup>* signature (*TREM2*, *SPP1*, *GPNMB*, *CD9*) mapped to a specific  
45 population of macrophages in human lesions. Cross-species data integration demonstrated  
46 transcriptionally proximal macrophage and dendritic cell populations in mice and humans.

47 **Conclusions-** We demonstrate conserved transcriptomics features of macrophages and  
48 dendritic cells in atherosclerosis in mice and humans, emphasizing the relevance of mouse  
49 models to study mononuclear phagocytes in atherosclerosis.

50

## 51 Introduction

52 Atherosclerosis is a chronic disease of the arterial wall characterized by chronic lipid  
53 accumulation and inflammation in the vascular intima, and its main clinical manifestations,  
54 myocardial infarction and ischemic stroke, together constitute the most frequent cause of death  
55 worldwide (1). Many adaptive and innate immune cell types have been proposed to contribute  
56 to vascular inflammation and atherosclerosis (2), and accumulation of macrophages and lipid-  
57 laden macrophage foam cells are hallmarks of atherosclerotic lesions (3). As lesional  
58 macrophages perform both atheroprotective (e.g. efferocytosis, lipid clearance) and  
59 atherogenic (inflammatory cytokine secretion, proteolysis) functions, it has long been assumed  
60 that functionally distinct macrophage subsets populate atherosclerotic vessels. Recent studies  
61 employing single-cell RNA-sequencing (scRNA-seq) analyses of the vascular immune cell  
62 infiltrate have shed new light on macrophage diversity in atherosclerosis (4), (5).

63 In mice, several independent scRNA-seq studies have evaluated the transcriptomic identity of  
64 aortic macrophages in experimental models of atherosclerosis (6-11), and identified  
65 heterogeneous disease-associated macrophage populations, with non-foamy macrophages  
66 characterized by a pro-inflammatory gene expression profile (Inflammatory macrophages),  
67 and lipid-laden foamy macrophages showing low expression of inflammatory genes, high  
68 expression of the myeloid receptor *Trem2* and of a set of genes involved in lipid metabolism  
69 or lysosome function (foamy/*Trem2*<sup>hi</sup> macrophages)(10, 11). We in addition have described  
70 macrophages with features of adventitial resident cells (*Lyve1* expression (12, 13)) in control  
71 and atherosclerotic aortas (Resident/Resident-like macrophages) (6). Macrophages with a  
72 strong type I interferon response signature, similar to interferon inducible cells (IFNICs) found  
73 in the ischemic heart (14), were also observed in atherosclerotic aortas (7), (9). A recent study,  
74 combining scRNA-seq analyses, fate mapping and imaging experiments, furthermore  
75 demonstrated the existence of a self-renewing aortic intimal resident macrophage (Mac-AIR)  
76 population in the normal mouse aorta, characterized by the expression of CD11c, MHCII and  
77 a specific transcriptomic signature (15). First available data in humans suggest that  
78 macrophages with distinct transcriptional states are also found in atherosclerotic vessels (16),  
79 (17), (18).

80 As mouse models of atherosclerosis are widely employed to decipher the pathogenesis of  
81 atherosclerosis, and to perform pre-clinical investigations of new potential therapeutic targets  
82 (19), it is critical to determine whether macrophage transcriptional states in atherosclerotic  
83 vessels are conserved across mouse models of atherosclerosis and whether the  
84 transcriptional states of macrophages in mouse atherosclerosis are of relevance to human  
85 disease. Recently developed computational tools allow integration of scRNA-seq data across  
86 independent studies, technological platforms, and species (20, 21), thus providing an

87 unprecedented opportunity to compare cellular states across experimental conditions, and  
88 from animal disease models to cells directly obtained from diseased tissue from patients (22).

89 Here, we performed a computational integration of scRNA-seq data of immune cells from  
90 independent studies investigating mouse models of atherosclerosis and human atherosclerotic  
91 plaque tissue, using the data integration features of the Seurat v3 package (20). Our work  
92 shows conserved transcriptomic features of macrophages in atherosclerosis across mouse  
93 models and identifies novel putative atherosclerosis-associated macrophage subpopulations.  
94 We also observed conserved dendritic cell populations in mouse and human atherosclerotic  
95 tissue. We further provide evidence that major features of macrophage states observed in  
96 mouse atherosclerosis are conserved in human lesions, emphasizing the relevance of mouse  
97 models to study macrophage biology in atherosclerosis.

98

## 99 **Methods**

100 Using 12 distinct mouse scRNA-seq datasets from 6 studies (6-9, 23), (15) (**Supplementary**  
101 **Table 1**), and 3 human scRNA-seq datasets from two studies (17, 24), we performed three  
102 integrated analyses (**Figure S IA-C**): (i) integration of all mouse data, (ii) integration of human  
103 mononuclear phagocyte data, and (iii) integration of mouse and human mononuclear  
104 phagocyte data. Deposited cell-gene count matrixes were analyzed in Seurat (20), where all  
105 datasets were first pre-processed individually for quality control filtering, selection of relevant  
106 cells for further analysis, and assignment of metadata information (e.g. species, protocol,  
107 patient) (**Supplementary Table 1, Figure SI**). To identify the sex of mice used in some studies  
108 where this information was unavailable (9), we interrogated the expression of X chromosome  
109 (*Xist*) or Y chromosome specific transcripts (*Ddx3y*, *Uty*, *Eif2s3y*) (**Figure S ID**). Most studies  
110 employed male mice, except *ApoE*<sup>-/-</sup> studies by Winkels et al. that used females (8), while Lin  
111 et al. (9) employed male mice for the atheroprogession and female mice for the  
112 atheroregression studies (**Figure SID, Supplementary Table 1**). Integration was performed  
113 using Seurat v3 (20), essentially according to the “Standard Workflow” protocol provided by  
114 the authors (<https://satijalab.org/seurat/v3.1/integration.html>). The code used for analysis will  
115 be provided as R notebooks. We have mostly limited data interpretation to qualitative aspects  
116 of cell transcriptional states and did not interpret quantitative changes (e.g. proportion of  
117 certain types of macrophages) beyond their presence/absence across experimental conditions  
118 or species. This is based on limitations of the individual studies, including lack of experimental  
119 replicates (mouse studies were performed with n=1 scRNA-seq run per condition), low number  
120 of patients and very low number of cells analyzed in some patients, as well as the poorly  
121 controllable differences in cell type recovery by tissue digestion and cell processing methods  
122 between studies. Overlapping marker gene lists shared between human macrophage clusters  
123 and their putative mouse counterparts were identified using InteractiVenn (25).

124

## 125 Results

### 126 Integrated analysis of mouse aortic immune cells scRNA-seq datasets

127 The integrated analysis of mouse aortic leukocyte datasets from different models of  
128 atherosclerosis and experimental conditions (**Table 1, Figure S I**) allowed us to analyze a final  
129 number of 22,852 cells (**Figure 1A, B**). We identified macrophages and dendritic cells based  
130 on the expression of canonical markers such as *Adgre1* (encoding F4/80), *Fcgr1* (encoding  
131 CD64) and *Itgax* (encoding CD11c) (**Figure 1C**). Several populations of T (*Cd3d*), B (*Cd79a*),  
132 Cytotoxic/NK cells (*Nkg7*) and neutrophils (*S100a8*, *S100a9*) could be discerned. A cluster  
133 resembling type 2 Innate Lymphoid Cells (ILC2) (*Il1rl1*, *Gata3*) was identified, possibly also  
134 containing mast cells and basophils (*Cpa3*, *Calca*) (**Figure S IIA**). We had previously identified  
135 these cells as mixed/mast cells in (6). A cluster of non-leukocytic cells was also found,  
136 originating from the scRNA-seq analysis of intimal BODIPY<sup>+</sup> foam cells, which included lipid  
137 rich intimal cells of both immune and non-immune origin (7).

### 138 Subpopulations of Resident/Resident-like and Inflammatory macrophages in atherosclerotic 139 aortas

140 Focusing our analysis on mononuclear phagocytes, we then performed clustering of cells  
141 corresponding to monocytes, macrophages, dendritic cells and proliferating cells at higher  
142 resolution to identify potential sub-populations within macrophages and dendritic cells (**Figure**  
143 **1D**). Resident/Resident-like macrophages (*Lyve1*, *Timd4*, *Mrc1*, *Pf4*) (**Figure 1D-F**) could be  
144 divided into two clusters, one of which showed higher expression of *Cd209d*, *Cd209f* and  
145 *Cd209g* (Res-Cd209) (**Figure 1D-F**), corresponding to Cd209<sup>+</sup> resident macrophages  
146 identified by Cole et al. (26). Macrophages corresponding to previously described  
147 'Inflammatory Mφ' also comprised two clusters: Inflammatory-*Nlrp3* macrophages displayed  
148 high *Nlrp3*, *Il1b* or *Kdm6b* expression, while a second subset of CCR2<sup>+</sup>MHCII<sup>+</sup> macrophages  
149 expressed *Ccr2*, MHCII encoding transcripts (*Cd74*, *H2-Aa*, *H2-Eb1*) and was enriched for  
150 *Tmem176a* and *Tmem176b* (**Figure 1D-F**). Proliferating cells could be delineated into S-phase  
151 and G2M-phase cells by applying cell cycle scoring in Seurat (20) (**Figure 1D, Figure S IIB**).  
152 In addition to major macrophage subsets, we observed populations consistent with a previous  
153 integrative analysis (5), including cells with a gene expression profile characteristic of small  
154 peritoneal macrophages (SPM/Cavity cluster: *Itgax*<sup>+</sup>*Cd226*<sup>+</sup>*Ccr2*<sup>+</sup>MHCII<sup>+</sup>) (5), type I interferon  
155 response cells (IFNIC cluster: *Isg15*, *Oasl2*), and monocytes expressing genes characteristic  
156 of Ly6C<sup>hi</sup> (*Ly6c2*, *Chil3*, *Ccr2*) and Ly6C<sup>low</sup> (*Ace*, *Trem14*) subsets (28) (**Figure 1D and F**).  
157 Immediate early genes (IEGs) expression can be induced in mononuclear phagocytes during  
158 tissue digestion and processing (27). Based on the expression of 18 IEGs, we applied an IEG  
159 expression score to macrophages and dendritic cells, and cells with the highest score mapped

160 to the ‘inflammatory M $\phi$ ’ clusters (**Figure SII C**). However, stress-induced gene expression is  
161 unlikely to have caused a major bias in our analysis, as cell clustering was not substantially  
162 affected by regressing out variability caused by expression of immediate early genes (**Figure**  
163 **SII D-F**).

#### 164 Subpopulations of *Trem2*<sup>hi</sup> macrophages and aortic intimal resident macrophages

165 We identified two clusters enriched for genes characteristic of the foamy/*Trem2*<sup>hi</sup> signature  
166 (10), (5): *Trem2*, *Spp1*, *Cd9*, *Itgax* (**Figure 1D-F**). The first population was further enriched for  
167 transcripts such as *Slamf9*, *Ch25h* and *Cd72* (*Trem2*<sup>hi</sup>-*Slamf9*, **Figure 1D and F**). The second  
168 population (*Trem2*<sup>hi</sup>-*Gpnmb*) was enriched for *Gpnmb*, *Atp6v0d2* and transcripts characteristic  
169 of a foamy signature and TREM2-reponse genes (29), (30) (*Lpl*, *Lipa*, *Fabp5*, *Apoc1*, *ApoE*)  
170 (**Figure 1D and F**). Consistent with previous analyses (6),(7) and recent observations in *ApoE*  
171 <sup>-/-</sup>*Cx3cr1*<sup>GFP</sup>*Cd11c*<sup>YFP</sup> mice (31), foamy/*Trem2*<sup>hi</sup> macrophages were enriched for *Itgax* (CD11c)  
172 (**Figure 1C and F**). Most intimal BODIPY<sup>+</sup> foam cells of the immune lineage from *ApoE*<sup>-/-</sup> mice  
173 (7) mapped to UMAP coordinates corresponding to foamy/*Trem2*<sup>hi</sup> macrophage clusters  
174 (**Figure 1B**).

175 Aortic intimal resident macrophages (Mac-AIR) have recently been described to populate the  
176 vascular intimal niche in the normal aorta and present a specific transcriptomic signature (15).  
177 Monocytes infiltrating the intima under atherogenic conditions have furthermore been  
178 proposed to acquire transcriptomic features resembling those of Mac-AIR, and to further  
179 upregulate lipid-metabolism related and TREM2-response associated transcripts (15), (30). To  
180 define the relationship of Mac-AIR with both *Trem2*<sup>hi</sup> populations, we first identified Mac-AIR in  
181 scRNA-seq data from healthy C57BL/6 aortas (15), and examined their position on the  
182 integrated data UMAP (**Figure 2A**). Mac-AIR from healthy aortas mapped mostly to the *Trem2*-  
183 *Gpnmb* (79 out of 107 cells, i.e. 73.8%) and the *Trem2*-*Slamf9* (23/107 cells, 21.5%) clusters  
184 (**Figure 2A**), in line with previous observations that Mac-AIR and intimal foamy macrophages  
185 are transcriptionally proximal (15). Mac-AIR mapped to an area of the UMAP characterized by  
186 high expression of MHCII-encoding transcripts (e.g. *Cd74*, *H2-Ab1*, *H2-Eb1* **Figure 1E**),  
187 consistent with MHCII expression by Mac-AIR (15). When clustering the integrated  
188 mononuclear phagocyte data using a higher resolution parameter in Seurat (20), we could  
189 identify an independent cluster mapping to Mac-AIR coordinates (‘Mac-AIR Signature’ cluster,  
190 **Figure 2B**). We analyzed differentially expressed genes between this ‘Mac-AIR Signature’  
191 cluster, the *Trem2*<sup>hi</sup>-*Gpnmb* cluster, and the *Trem2*<sup>hi</sup>-*Slamf9* cluster. Expectedly, Mac-AIR  
192 were enriched for MHCII encoding transcripts, but also for other genes e.g. *Vcam1* and *Hes1*  
193 (**Figure 2C**). Relative to Mac-AIR and *Trem2*<sup>hi</sup>-*Gpnmb*, the *Trem2*<sup>hi</sup>-*Slamf9* cluster was  
194 enriched for *Nes*, *Cd72*, *Ch25h*, and inflammatory markers (*Tnfsf9*, *Il1b*) (**Figure 2C**), although  
195 these were expressed at lower levels than in bona fide pro-inflammatory macrophages (**Figure**

196 **1F**, and not shown). *Trem2<sup>hi</sup>-Gpnmb* had a specific signature including e.g. *Ii7r*, *Psap* and  
197 *Fabp5* (**Figure 2C**). Importantly, Mac-AIR expressed lower levels of *Trem2*, *Spp1* and *Cd9*  
198 (**Figure 2D**), transcripts generally associated with the disease-associated “*Trem2<sup>hi</sup>*” signature  
199 in atherosclerosis (5),(6) and other diseases (30). Mac-AIR and *Trem2<sup>hi</sup>-Gpnmb*, but not  
200 *Trem2<sup>hi</sup>-Slamf9*, expressed *Acp5* (**Figure 2D**). A similar signature was obtained when  
201 comparing only Mac-AIR from healthy C57 aortas (15) versus the *Trem2<sup>hi</sup>-Gpnmb* and  
202 *Trem2<sup>hi</sup>-Slamf9* populations (not shown).

203 We then analyzed the presence of *Trem2<sup>hi</sup>-Gpnmb* and *Trem2<sup>hi</sup>-Slamf9* and Mac-AIR clusters  
204 across datasets (**Figure 2E**) and calculated their relative abundance among total mononuclear  
205 phagocytes in control and atherosclerotic aortas (**Figure 2F**, not all datasets were considered,  
206 see Figure 2 legend). *Trem2<sup>hi</sup>-Gpnmb* macrophages represented 1% or less of all  
207 mononuclear phagocytes in control aortas, and 4.6% to 21.6% in atherosclerotic arteries.  
208 *Trem2<sup>hi</sup>-Slamf9* cells represented 5-10% of all mononuclear phagocytes both in control and  
209 atherogenic conditions. Mac-AIR represented less than 6% of all aortic mononuclear  
210 phagocytes in all the conditions (**Figure 2F**). While these analyses are statistically limited given  
211 the low number of replicates and low cell numbers in some datasets, they nevertheless clearly  
212 confirm that *Trem2<sup>hi</sup>-Gpnmb* macrophages with a foamy macrophage gene expression  
213 signature are induced by atherogenic conditions.

214 *Trem2<sup>hi</sup>-Gpnmb*, *Trem2<sup>hi</sup>-Slamf9*, and Mac-AIR were predominant in the intimal foam cell  
215 dataset from Kim et al. (7) in the integrated analysis (**Figure 2E**), representing 38%, 14% and  
216 9% of mononuclear phagocytes, respectively. Analysis of this dataset alone recovered three  
217 macrophage populations with expression signatures reminiscent of Mac-AIR (*Acp5*, *Cd74*,  
218 *Mmp12*, *Gngt2*), *Trem2<sup>hi</sup>-Gpnmb* (*Gpnmb*, *Fabp5*, *Cstb*, *Psap*), and *Trem2<sup>hi</sup>-Slamf9* (*Slamf9*,  
219 *Cd72*, *Cd14*, *Ch25h*) macrophages (**Figure SIII A-B**), further indicating that *Trem2<sup>hi</sup>-*  
220 *Gpnmb*, *Trem2<sup>hi</sup>-Slamf9* and Mac-AIR contribute to intimal foamy macrophages.

221 Altogether, this integrated analysis shows that atherosclerosis-associated macrophage  
222 transcriptional states are conserved across experimental mouse models of atherosclerosis,  
223 and that discrete subpopulations exist within the main aortic macrophage subtypes. We further  
224 confirm that Mac-AIR that reside in the normal mouse intima share transcriptional similarities  
225 with Foamy/*Trem2<sup>hi</sup>* macrophages but express higher levels of transcripts encoding MHCII,  
226 express lower levels of *Trem2*, and do not express a specific set of transcripts characteristic  
227 of the disease-associated Foamy/*Trem2<sup>hi</sup>* signature.

#### 228 *Aortic macrophage subsets in angiotensin-II induced vascular inflammation*

229 To investigate whether similar macrophage states could be observed in a distinct context of  
230 aortic inflammation, we integrated the mononuclear phagocyte data (**Figure 1D**) from



231 atherosclerosis studies with recently generated data in a model of angiotensin II-induced aortic  
232 inflammation also characterized by extensive macrophage infiltration and activation (32). All  
233 the mononuclear phagocyte population observed in atherosclerotic aortas were recovered in  
234 the aortic adventitia in the Angiotensin-II inflammation model (**Figure S IVA-C**). While pro-  
235 inflammatory CCR2<sup>+</sup>MHCII<sup>+</sup> macrophages (also enriched for *Tmem176a/Tmem176b*, **Figure**  
236 **S IVC**) dominated in this model (726 out of 2932 cells, 24.76%), we observed a prominent  
237 population of *Trem2<sup>hi</sup>-Gpnmb* cells (196 cells, 6.68%), indicating that these cells are also  
238 present during aortic inflammation in hyperlipidemia-independent models (**Figure S IVA-C**).

### 239 Integrated analysis of aortic dendritic cells in mouse atherosclerosis

240 We identified cells corresponding to monocyte-derived DCs and/or cDC2 (MoDC/cDC2:  
241 *Cd209a*, *Clec10a*, *Ifitm1*, *Napsa*), cDC1 (*Xcr1<sup>+</sup>Clec9a<sup>+</sup>*), and *Fscn1<sup>+</sup>Ccr7<sup>+</sup>* mature DCs (**Figure**  
242 **1D, Figure S VA**). We had previously identified the MoDC/cDC2 cluster as potential monocyte-  
243 derived dendritic cells based on the expression of *Cd209a* (33), and intermediate expression  
244 of monocytic markers (*Ccr2*, *Csf1r*) (6). However, a recent report indicates that in inflammatory  
245 conditions, cDC2 can acquire an “inflammatory-cDC2” state with surface CD64 expression,  
246 that can be discriminated from monocyte-derived cells by expression of CD26 (encoded by  
247 *Dpp4*) and absence of expression of CD88 (encoded by *C5ar1*) (34). Recent work further  
248 suggests that CD88 can aptly discriminate monocyte/macrophages from dendritic cells in mice  
249 and humans (35). In atherosclerotic aortas, the MoDC/cDC2 cluster expressed *Dpp4* (CD26)  
250 but not *C5ar1* (CD88) (**Figure S VB**), suggesting that these cells likely represent bona fide  
251 cDC2. Recently, *Fscn1<sup>+</sup>Ccr7<sup>+</sup>* “mature DCs enriched in immunoregulatory molecules” (mReg-  
252 DC) have been described in mouse and human lung cancer (36). We analyzed whether  
253 *Fscn1<sup>+</sup>Ccr7<sup>+</sup>* mature DCs from atherosclerotic aortas share features with this mReg-DC  
254 transcriptomic signature. Compared to cDC1 and cDC2 populations, aortic mature  
255 *Fscn1<sup>+</sup>Ccr7<sup>+</sup>* DCs were clearly enriched for several genes characteristic of the mReg-DC  
256 signature, such as *Il4i1*, *Cd274*, *Tnfrsf4*, or *Ccl22*, and transcripts encoding co-stimulatory  
257 molecules (*Cd40*, *Cd80*, *Cd86*) (**Figure S VA**).

### 258 Integrated analysis of human macrophages in atherosclerosis uncovers three major 259 macrophage populations

260 To gain further insight into the transcriptional state of macrophages in human atherosclerosis,  
261 we integrated scRNA-seq data from Fernandez et al. investigating carotid endarterectomy  
262 specimens (24), and Wirka et al. analyzing atherosclerotic coronary arteries from explanted  
263 hearts of transplant recipients (17). Data from Fernandez et al.(24) were obtained from batch  
264 corrected gene expression matrices, as provided by the authors, of 1 lesion analyzed by CITE-  
265 seq (Fernandez\_CITE, n=254 cells), and plaques from 6 patients analyzed by scRNA-seq (4

266 asymptomatic patients: ASYM1 to 4, and 2 symptomatic patients: SYM1 and 2; n= 746 total  
267 cells), (**Figure SI**). Wirka et al. reported significant batch effects across patients (17), so that  
268 cells from each patient were considered as independent samples (referred to as Wirka\_1 to  
269 Wirka\_4) in computational integration analyses (**Figure SI**). Data from Wirka et al.(17)  
270 contained not only immune cells but all vascular cell types, so that we first identified  
271 mononuclear phagocytes (expressing e.g. *CD14*, *CD68*, *CSF1R*, *C1QA*, *CD52*), and extracted  
272 the corresponding data for further integration.

273 A total of 2,890 cells were included in the integrated analysis, and 10 clusters were recovered  
274 (**Figure 3A**). Macrophages were identified based on the expression of markers such as *CD68*,  
275 *C1QA* and *C5AR1* (**Figure 3B**). Differential gene expression analyses across clusters  
276 identified 3 major human (h) macrophage populations: hInflammatory-M $\phi$  (*CD74*, *HLA-DRB1*),  
277 putative hFoamy-M $\phi$  (*APOC1*, *APOE*, *FABP5*, *FABP4*), and hLYVE1-M $\phi$  (*LYVE1*, *LGMN*,  
278 *MARCO*) (**Figure 3A and C**). Additional minor populations were characterized by expression  
279 of e.g. *C3*, *JUN* and *CCL4* (hC3-M $\phi$ ) and Type I IFN response macrophages (hIFNIC-M $\phi$   
280 cluster; *ISG15*, *IFI6*, *MX1*). In addition, cells corresponding to monocytes (hMonocytes: *VCAN*,  
281 *CD52*, *S100A8*, *S100A9*, *LYZ*)(37), were readily observed. Other minor clusters of proliferating  
282 cells (hProlif cluster: *TUBB*, *H2AFZ*, *STMN1*) and B cells (hB\_cell cluster: *MZB1*, *JCHAIN*)  
283 were also observed (**Figure 3A and C**).

284 We could also recover cDC1 (hcDC1: *CLEC9A*, *IRF8*, *IDO1*) and cDC2 (hcDC2: *CLEC10A*,  
285 *FCER1A*, *CD1C*) (38) populations (**Figure 3A-B**). No cluster of mature DCs was readily  
286 observable, but we recovered a population of DCs with some features of the mature/mReg-  
287 DC signature (*CCL17*, *CCL19*, *MARCKSL1*, *IDO1*) when manually gating FSCN1<sup>+</sup>CCR7<sup>+</sup> cells  
288 (n=9 cells) within total DCs (**Figure S VC and D**). Although these results need to be cautiously  
289 interpreted given the low number of cells analyzed, they suggest that dendritic cell populations  
290 proximal to those observed in mice populate human atherosclerosis.

291 The number of analyzed cells per patient ranged from n=2 (patient SYM2 from ref.(24)) to 1053  
292 (patient 3 from (17)) (**Figure 3D**). Proportions of cell clusters varied greatly across patients  
293 (**Figure 3E**), which may reflect the well-known heterogeneity of plaque composition and  
294 morphology in patients (39-41) and difficulty in retrieving cells from human atherosclerotic  
295 tissues, and stresses the need for additional studies including more patients and cells. Low  
296 number of cells in some patients (ASYM1, SYM2) precludes interpretation of cluster repartition  
297 in these samples (**Figure 3E**). All the clusters were present in both vascular beds (**Figure 3E**).

298 Gene expression patterns within the three main human macrophage populations  
299 (hInflammatory-M $\phi$ , hFoamy-M $\phi$  and hLYVE1-M $\phi$ ) clearly suggested proximity to the major  
300 mouse aortic macrophage subsets we previously identified (6). Thus, we next performed

301 differential gene expression analysis specifically within the 3 main human macrophage  
302 clusters, namely hInflammatory-M $\phi$ , hFoamy-M $\phi$  and hLYVE1-M $\phi$ , and examined overlap with  
303 marker genes of mouse aortic Inflammatory, foamy/*Trem2*<sup>hi</sup> and resident/resident-like  
304 macrophages. This revealed that besides MHCII encoding genes (*CD74*), hInflammatory-M $\phi$   
305 were enriched in inflammatory cytokines (*CXCL2*, *CCL3*, *CCL4*, *IL1B*), receptors  
306 (*CLEC4E*)(42) and transcriptional regulators (*IER3*, *NFKBIA*, *NR4A2*) similarly found in mouse  
307 Inflammatory-M $\phi$ . hFoamy-M $\phi$  showed an enrichment in markers characteristic of mouse  
308 foamy/*Trem2*<sup>hi</sup> macrophages (*TREM2*, *CD9*, *GPNMB*, *SPP1*, *CTSL*, *LIPA*, *ACP5*), and  
309 hLYVE1-M $\phi$  expressed genes associated with mouse resident/resident-like macrophages  
310 (*LYVE1*, *CD163*, *SEPP1*, *FOLR2*, *F13A1*, *MRC1*, *VSIG4*) (**Figure 3F**).

311 To further evaluate the similarity between macrophage clusters observed in human and mouse  
312 atherosclerosis, we performed gene ontology enrichment (GO) analyses, which revealed  
313 enrichment in similar biological processes, cellular components or molecular functions  
314 (**Supplementary Excel file**). In particular, hFoamy-M $\phi$  and mouse foamy/*Trem2*<sup>hi</sup>  
315 macrophages were enriched for putative functions related to lipid metabolism (e.g. biological  
316 process GO terms: lipid catabolic process, lipid storage, cellular response to lipoprotein particle  
317 stimulus), and similar molecular functions (e.g. molecular function GO terms: fatty acid binding,  
318 lipase activity, antioxidant activity, low-density lipoprotein particle binding) (**Supplementary  
319 Excel file**).

### 320 Cross species integration reveals conserved macrophage transcriptional states in mouse and 321 human atherosclerosis

322 To further investigate the proximity of the transcriptional states of mouse to human  
323 macrophages in atherosclerosis, we performed cross-species integration of scRNA-seq data.  
324 Mouse gene symbols were converted to their human homologs using the BioMart-Ensembl  
325 database. Mouse datasets were pre-processed to identify and extract cells corresponding to  
326 mononuclear phagocytes (macrophages, monocytes, dendritic cells), and integrated with the  
327 human data. After integration in Seurat v3 and dimensional reduction, clustering analysis  
328 generated 10 clusters (**Figure 4A**), with a clear mouse to human overlap (**Figure 4B**). By  
329 identifying and annotating cell clusters based on the characteristic gene expression patterns  
330 identified in the integrated human data and based on the mouse homologues in the integrated  
331 mouse data, we could readily recover integrated (int) Inflammatory macrophages (int-  
332 Inflammatory-M $\phi$ : *CD83*, *CCRL2*, *IFRD1*), int-Res/Res-like-M $\phi$  (*LYVE1*, *FOLR2*, *F13A1*), int-  
333 Foamy/TREM2<sup>hi</sup>-M $\phi$  (*GPNMB*, *CD9*, *SPP1*, *FABP5*), int-MoDC/cDC2 (*NAPSA*, *KLRD1*), int-  
334 Monocytes (*PLAC8*, *MSRB1*, *THBS1*), int-IFN $\gamma$ -M $\phi$  (*IRF7*, *ISG15*), int-*FSCN1/CCR7*-DCs,  
335 and int-*XCR1/IRF8*-cDC1 (**Figure 4C**). All clusters contained both mouse and human cells  
336 (**Figure 4B**). This suggests that cDC1, cDC2, mature DCs, classical monocytes, and

337 macrophages observed in mouse atherosclerotic aortas are also found within human lesions,  
338 and that macrophages that populate human lesions display transcriptional states proximal to  
339 the major mouse aortic macrophage subsets (Resident/Resident-like, Inflammatory,  
340 Foamy/Trem2<sup>hi</sup>, IFNIC).

341 We further mapped the UMAP-embeddings and clustering characteristics of the cellular states  
342 defined in the human data (see **Figure 3A**) to the mouse/human integrated data (**Figure 4A**).  
343 Overall, the major human macrophage subtypes mapped to the expected integrated clusters  
344 (**Figure 4D and E**). hInflammatory-M $\phi$  mapped mostly to int-Inflammatory-M $\phi$  (64%), hFoamy-  
345 M $\phi$  mapped to int-Foamy/TREM2<sup>hi</sup>-M $\phi$  (63%), hIFNIC-M $\phi$  to int-IFNIC-M $\phi$  (69%), hLYVE1-  
346 M $\phi$  to int-Res/Res-like-M $\phi$  (73%) hMonocytes to int-Monocytes (80%), and hC3<sup>+</sup>-M $\phi$  to int-  
347 Inflammatory-M $\phi$  (86%) (**Figure 4E**). However, we did not observe a full overlap between  
348 human and integrated clusters (e.g. 17% of hInflammatory-M $\phi$  mapped to int-  
349 Foamy/TREM2<sup>hi</sup>-M $\phi$ ), which could be attributed to macrophages with intermediate  
350 transcriptional profiles between two polarized states, and loss of information due to inclusion  
351 of only those genes with unambiguous human-to-mouse homologs in the cross-species  
352 integrated analysis. This was also particularly clear for other cell populations, such as human  
353 cDC2, which mapped almost equally to int-MoDC/cDC2 (46%) and int-Inflammatory-M $\phi$   
354 (39%). This can be explained by shared enrichment for inflammatory markers (e.g. *IL1B*,  
355 *SOCS3*), and specific markers of human cDC2 not being conserved (*CD1C*) or showing a  
356 wider/distinct expression patterns (*FCER1A*, *CLEC10A*) in mice. Altogether, this cross-species  
357 integration analysis substantiates the notion that macrophages with similar transcriptional  
358 states populate human and mouse atherosclerotic lesions.

359

## 360 Discussion

361 We here show that major macrophage and dendritic cell transcriptional states are conserved  
362 across widely employed mouse models of atherosclerosis, and that human lesions are  
363 populated by mononuclear phagocytes displaying transcriptional states resembling those  
364 found in mouse atherosclerosis. We provide two layers of evidence for this conclusion: (i)  
365 integrated analysis of human lesion scRNA-seq data from two independent studies recovered  
366 macrophage and dendritic cell states highly proximal to those observed in mice and (ii) direct  
367 cross-species data integration showed a strong overlap between mouse and human  
368 mononuclear phagocyte states.

369 Accumulation of macrophage foam cells in the intima is instrumental to lesion development.  
370 Macrophages reminiscent of the foamy/*Trem2<sup>hi</sup>* macrophage state were observed across  
371 mouse models of atherosclerosis and in human lesions. Mononuclear phagocytes with a  
372 transcriptional signature proximal to the foamy/*Trem2<sup>hi</sup>* macrophage state found in  
373 atherosclerosis have been observed in mouse models of neurodegenerative disease (disease  
374 associated microglia, DAM (43)), demyelinating disease (44), non-alcoholic steatohepatitis  
375 (NAM: NASH associated macrophages) (45), metabolic-associated fatty liver disease (46),  
376 liver fibrosis (SAM: scar associated macrophages) (47), and diet-induced obesity (LAM: lipid-  
377 associated macrophages) (48). In the diseased liver and adipose tissue, features of this  
378 transcriptomic state were similar in mice and humans, with many transcriptomic or cell surface  
379 markers such as *TREM2*, *SPP1* or *CD9* (45, 47), (46) being conserved across species. The  
380 situation seems more complex in neurodegeneration-associated microglia as the characteristic  
381 DAM signature was not readily detected in single-nucleus RNA-seq (snRNA-seq) analysis of  
382 human neurodegenerative brain samples (49). However, this observation might be due to  
383 technical issues, as characteristic genes of the DAM signature such as *APOE* or *SPP1* were  
384 poorly detected in single-nucleus compared to single-cell RNA-seq (50). This technical  
385 limitation, if further confirmed, needs to be taken into consideration in future snRNA-seq  
386 analyses of atherosclerotic samples.

387 LAM, DAM and atherosclerosis-associated foamy/*Trem2<sup>hi</sup>* macrophages share expression of  
388 a set of genes with enrichment in lipid metabolism pathways (48), suggesting that similar  
389 mechanisms related to lipid loading may drive acquisition of this macrophage state.  
390 Nevertheless, further analyses will be required to determine the fine tissue- and species-  
391 specific particularities of these macrophages. Evidence from neurodegenerative disease  
392 models indicate that acquisition of the DAM state may depend on *Apoe* (51), which raised the  
393 possibility that acquisition of the foamy/*Trem2<sup>hi</sup>* macrophage state might differ between the  
394 most widely employed mouse models of atherosclerosis, i.e *Ldlr<sup>-/-</sup>* and *Apoe<sup>-/-</sup>* mice. However,  
395 consistent with previous reports (6, 7), our integrated analysis indicates that *Apoe* expression

396 appears dispensable for the acquisition of the foamy/*Trem2*<sup>hi</sup> macrophage state in mouse  
397 arteries. Fully elucidating the impact of the mouse genotype on macrophage states will require  
398 more suitable experimental designs including biological replicates and differential gene  
399 expression in the absence of overt batch correction, e.g. by employing single-cell multiplexing  
400 technologies such as cell hashing (52) or MULTI-Seq (53). Recently, we identified *Trem2*<sup>hi</sup>  
401 macrophages in the ischemic mouse heart sharing gene expression similarities with the  
402 LAM/DAM/foamy signature (28), and two reports identified *Trem2* enriched  
403 immunosuppressive macrophages in tumor models (54), (55), indicating that part of this  
404 transcriptional signature may not only be related to pathological lipid loading, but rather more  
405 generally induced in contexts of tissue damage. Our observation that macrophages with a  
406 *Trem2*<sup>hi</sup> signature populate the aorta in the context of Angiotensin-II mediated inflammation  
407 corroborates this notion. Major transcriptional hubs involved in regulation of lipid homeostasis  
408 such as the liver-X-receptor (LXR) pathway are activated also in response to efferocytosis of  
409 dead cells (56), raising the possibility that macrophages with high efferocytic activity may also  
410 acquire a foamy/*Trem2*<sup>hi</sup> gene expression signature.

411 By analyzing a large number of mouse macrophages in our integrated approach, we could  
412 identify discrete subpopulations within foamy/*Trem2*<sup>hi</sup> macrophages, including recently  
413 identified aortic intimal resident macrophages (MAC-AIR) (15). We furthermore identified two  
414 subsets we termed *Trem2*<sup>hi</sup>-*Slamf9* and *Trem2*<sup>hi</sup>-*Gpnmb*. Analysis of gene expression patterns  
415 is in line with the notion that MAC-AIR present a gene expression signature specific to the  
416 vascular intimal niche that is acquired by infiltrating monocytes, and that lesion-associated  
417 foamy macrophages further attain the expression of a disease specific gene signature (15).  
418 Importantly, canonical markers of this signature (*Trem2*, *Spp1*) appeared to have a low  
419 expression in MAC-AIR. While strong recovery of these three clusters in single-cell data from  
420 aortic intimal foamy cells (7) and recent fate-mapping and imaging analysis (15) clearly  
421 suggest that these populations populate the intima, their precise localization within the complex  
422 morphology of arteries remains to be further defined. Likewise, while Williams et al. have  
423 identified MAC-AIR as self-renewing resident macrophages seeded by monocytes during the  
424 perinatal period (15), the ontogeny of *Trem2*<sup>hi</sup>-*Slamf9* and *Trem2*<sup>hi</sup>-*Gpnmb* macrophages  
425 requires further investigation. However, extrapolation of decades of research on foamy  
426 macrophage accumulation in atherosclerosis clearly suggests a monocytic origin of these cells,  
427 which could be confirmed in future analyses using recently developed monocyte fate-mapping  
428 models based on *Ms4a3* (57) or *Cxcr4* (58). Finally, whether similar subpopulations of  
429 foamy/*Trem2*<sup>hi</sup> macrophages can be detected in human lesions will require sampling of a larger  
430 number of human lesional macrophages.

431 We observed macrophages corresponding to inflammatory macrophages both in mice and  
432 humans. Compared to other macrophages, these are characterized by expression of genes  
433 encoding MHCII/HLA genes, and inflammatory cytokines (e.g. *IL1B*, inflammatory  
434 chemokines). Macrophages with a type I interferon signature (IFNIC)(14) were also observed  
435 in mice and humans.

436 In mice, resident/resident like macrophages are defined by expression of a characteristic set  
437 of genes (*Lyve1*, *Folr2*, *Sepp1*, *F13a1*, *Pf4*, *Cd163*). In human lesional macrophages, we  
438 identified a subset of cells with a clearly overlapping transcriptional state. The exact localization  
439 of these cells in human diseased vessels remains to be fully elucidated. In mice, *Lyve1*<sup>+</sup>  
440 macrophages are typically located in the adventitia (12, 13). We had previously observed  
441 LYVE1 protein expression in macrophages in carotid endarterectomy specimens by  
442 immunohistochemistry (6), and we here detected *LYVE1*<sup>+</sup> macrophages in scRNA-seq in  
443 carotid endarterectomy plaques. As the adventitia is not extracted during the carotid  
444 endarterectomy procedure, this indicates that cells with the Resident/Resident-like/*LYVE1*<sup>+</sup>  
445 state may be found within human lesions. However, in a recent report, Alsaigh et al. performed  
446 single-cell analysis of atherosclerotic lesions from 3 patients, where cells from the  
447 atherosclerotic core and the proximal adjacent coronary artery were analyzed (59).  
448 Macrophages with the foam cell signature (*APOE*, *APOC1*) were observed in the  
449 atherosclerotic core, while *LYVE1* enriched macrophages were in the proximal adjacent  
450 coronary artery (59). Future investigations employing spatial transcriptomic methods (60) will  
451 help shed light on the precise localization of macrophage populations within diseased vessels.

452 While our work provides proof-of-concept of conserved transcriptional features of macrophage  
453 states across mouse and human atherosclerosis, further acquisition of high-quality data is  
454 clearly needed to fully elucidate the phenotypical landscape of human lesional macrophages,  
455 and cross-species characteristics of macrophage states. Altogether, our analysis  
456 encompasses cells from 11 patients across 2 vascular beds (carotid and coronary arteries).  
457 While mice employed in experimental models of atherosclerosis are rather homogeneous  
458 (same genetic background, age, sex, absence of additional comorbidities), patients represent  
459 a highly heterogeneous population, and many factors (e.g. age, sex, comorbidities such as  
460 diabetes, etc...) are known to influence plaque immune composition (20, 61-63). Even in  
461 patients with a similar clinical profile, atherosclerotic lesions are highly heterogeneous in their  
462 morphology and cellular composition (39-41). Hence, we propose that to identify macrophage  
463 transcriptional states correlated to clinically relevant events, analysis of a vast number of cells  
464 from many patients, and of cells from different vascular beds, will be necessary. Besides  
465 increasing statistical power to balance patient and plaque heterogeneity, technical issues  
466 remain an additional important hurdle for single-cell analyses of clinical samples (64). The

467 human and mouse studies included here all employed enzymatic digestion of tissues, which  
468 leads to cell recovery that may not represent the true composition of *in vivo* lesions as some  
469 cells (in particular macrophage foam cells) may be more difficult to recover compared to other  
470 cells, and which causes artificial gene expression patterns such as induction of immediate  
471 early genes (27, 65). Single-nucleus RNA-seq, which bypasses the need for enzymatic tissue  
472 digestion, might be particularly suited to the analysis of human atherosclerosis, although poor  
473 detection of key mononuclear phagocyte genes may need to be carefully accounted for (50).

474 Altogether, our work provides proof of concept that macrophage transcriptomic states in  
475 atherosclerosis are conserved across mouse models of the disease and different vascular  
476 beds in humans. These findings are of importance for experimental investigations of  
477 macrophage function in atherosclerosis and their potential clinical translation. However, further  
478 research is critically needed to obtain a better understanding of macrophage populations and  
479 their states in human atherosclerosis, and of the fine differences between the human and  
480 mouse species that may bias pre-clinical investigations. Such research will benefit both from  
481 methodological advances as well as the analyses of substantially increased numbers of  
482 patients.

483

484



485 **Acknowledgements**

486 A.Z. was supported by the Interdisciplinary Center for Clinical Research (Interdisziplinäres  
487 Zentrum für Klinische Forschung [IZKF]), University Hospital Würzburg (E-352 and A-384),  
488 and the Deutsche Forschungsgemeinschaft (DFG; German Research Foundation, 374031971  
489 - TRR 240, 324392634 - TR221, ZE827/13-1, 14-1, 15-1, and 16-1). This study was further  
490 supported by the SFB 1123 project A07 (to C.S.), as well as the DZHK (German Centre for  
491 Cardiovascular Research) and the BMBF (German Ministry of Education and Research)  
492 (grants 81Z0600204 to C.S. and 81X2600252 to T.W.), and the BMBF within the  
493 Comprehensive Heart Failure Centre Würzburg (BMBF 01EO1504 to C.C. and A-E.S.). K.L.  
494 was supported by NIH P01 HL136275, R35 HL145241, and R01 HL146134. A.-E.S. is  
495 supported by the EMBO Young Investigator Program. C. C. was supported by the  
496 Interdisciplinary Center for Clinical Research (IZKF), University Hospital Würzburg (E-353) and  
497 the DFG (CO1220/1-1).

498

499 **References**

- 500 1. Libby P, Buring JE, Badimon L, Hansson GK, Deanfield J, Bittencourt MS, Tokgozoglu  
501 L, Lewis EF. 2019. Atherosclerosis. *Nat Rev Dis Primers* 5: 56
- 502 2. Wolf D, Ley K. 2019. Immunity and Inflammation in Atherosclerosis. *Circ Res* 124: 315-  
503 27
- 504 3. Cochain C, Zerneck A. 2017. Macrophages in vascular inflammation and  
505 atherosclerosis. *Pflugers Arch* 469: 485-99
- 506 4. Willemssen L, de Winther MPJ. 2020. Macrophage subsets in atherosclerosis as defined  
507 by single-cell technologies. *J Pathol*
- 508 5. Zerneck A, Winkels H, Cochain C, Williams JW, Wolf D, Soehnlein O, Robbins CS,  
509 Monaco C, Park I, McNamara CA, Binder CJ, Cybulsky MI, Scipione CA, Hedrick CC,  
510 Galkina EV, Kyaw T, Ghosheh Y, Dinh HQ, Ley K. 2020. Meta-Analysis of Leukocyte  
511 Diversity in Atherosclerotic Mouse Aortas. *Circ Res* 127: 402-26
- 512 6. Cochain C, Vafadarnejad E, Arampatzi P, Pelisek J, Winkels H, Ley K, Wolf D, Saliba  
513 AE, Zerneck A. 2018. Single-Cell RNA-Seq Reveals the Transcriptional Landscape  
514 and Heterogeneity of Aortic Macrophages in Murine Atherosclerosis. *Circ Res* 122:  
515 1661-74
- 516 7. Kim K, Shim D, Lee JS, Zaitsev K, Williams JW, Kim KW, Jang MY, Seok Jang H, Yun  
517 TJ, Lee SH, Yoon WK, Prat A, Seidah NG, Choi J, Lee SP, Yoon SH, Nam JW, Seong  
518 JK, Oh GT, Randolph GJ, Artyomov MN, Cheong C, Choi JH. 2018. Transcriptome  
519 Analysis Reveals Nonfoamy Rather Than Foamy Plaque Macrophages Are  
520 Proinflammatory in Atherosclerotic Murine Models. *Circ Res* 123: 1127-42
- 521 8. Winkels H, Ehinger E, Vassallo M, Buscher K, Dinh HQ, Kobiyama K, Hamers AAJ,  
522 Cochain C, Vafadarnejad E, Saliba AE, Zerneck A, Pramod AB, Ghosh AK, Anto  
523 Michel N, Hoppe N, Hilgendorf I, Zirlik A, Hedrick CC, Ley K, Wolf D. 2018. Atlas of the  
524 Immune Cell Repertoire in Mouse Atherosclerosis Defined by Single-Cell RNA-  
525 Sequencing and Mass Cytometry. *Circ Res* 122: 1675-88
- 526 9. Lin JD, Nishi H, Poles J, Niu X, McCauley C, Rahman K, Brown EJ, Yeung ST, Vozhilla  
527 N, Weinstock A, Ramsey SA, Fisher EA, Loke P. 2019. Single-cell analysis of fate-  
528 mapped macrophages reveals heterogeneity, including stem-like properties, during  
529 atherosclerosis progression and regression. *JCI Insight* 4
- 530 10. Cochain C, Saliba AE, Zerneck A. 2018. Letter by Cochain et al Regarding Article,  
531 "Transcriptome Analysis Reveals Nonfoamy Rather Than Foamy Plaque Macrophages  
532 Are Proinflammatory in Atherosclerotic Murine Models". *Circ Res* 123: e48-e9
- 533 11. Kim K, Choi JH. 2018. Response by Kim and Choi to Letter Regarding Article,  
534 "Transcriptome Analysis Reveals Nonfoamy Rather Than Foamy Plaque Macrophages  
535 Are Proinflammatory in Atherosclerotic Murine Models". *Circ Res* 123: e50
- 536 12. Lim HY, Lim SY, Tan CK, Thiam CH, Goh CC, Carbajo D, Chew SHS, See P, Chakarov  
537 S, Wang XN, Lim LH, Johnson LA, Lum J, Fong CY, Bongso A, Biswas A, Goh C,  
538 Evrard M, Yeo KP, Basu R, Wang JK, Tan Y, Jain R, Tikoo S, Choong C, Weninger W,  
539 Poidinger M, Stanley RE, Collin M, Tan NS, Ng LG, Jackson DG, Ginhoux F, Angeli V.  
540 2018. Hyaluronan Receptor LYVE-1-Expressing Macrophages Maintain Arterial Tone  
541 through Hyaluronan-Mediated Regulation of Smooth Muscle Cell Collagen. *Immunity*  
542 49: 326-41 e7
- 543 13. Ensan S, Li A, Besla R, Degousee N, Cosme J, Roufaiel M, Shikatani EA, El-Maklizi  
544 M, Williams JW, Robins L, Li C, Lewis B, Yun TJ, Lee JS, Wieghofer P, Khattar R,  
545 Farrokhi K, Byrne J, Ouzounian M, Zavitz CC, Levy GA, Bauer CM, Libby P, Husain M,  
546 Swirski FK, Cheong C, Prinz M, Hilgendorf I, Randolph GJ, Epelman S, Gramolini AO,  
547 Cybulsky MI, Rubin BB, Robbins CS. 2016. Self-renewing resident arterial  
548 macrophages arise from embryonic CX3CR1(+) precursors and circulating monocytes  
549 immediately after birth. *Nat Immunol* 17: 159-68
- 550 14. King KR, Aguirre AD, Ye YX, Sun Y, Roh JD, Ng RP, Jr., Kohler RH, Arlauckas SP,  
551 Iwamoto Y, Savol A, Sadreyev RI, Kelly M, Fitzgibbons TP, Fitzgerald KA, Mitchison T,

- 552 Libby P, Nahrendorf M, Weissleder R. 2017. IRF3 and type I interferons fuel a fatal  
553 response to myocardial infarction. *Nat Med* 23: 1481-7
- 554 15. Williams JW, Zaitsev K, Kim KW, Ivanov S, Saunders BT, Schrank PR, Kim K,  
555 Elvington A, Kim SH, Tucker CG, Wohltmann M, Fife BT, Epelman S, Artyomov MN,  
556 Lavine KJ, Zinselmeyer BH, Choi JH, Randolph GJ. 2020. Limited proliferation capacity  
557 of aortic intima resident macrophages requires monocyte recruitment for  
558 atherosclerotic plaque progression. *Nat Immunol* 21: 1194-204
- 559 16. Fernandez DM, Rahman AH, Fernandez NF, Chudnovskiy A, Amir ED, Amadori L,  
560 Khan NS, Wong CK, Shamailova R, Hill CA, Wang Z, Remark R, Li JR, Pina C, Faries  
561 C, Awad AJ, Moss N, Bjorkegren JLM, Kim-Schulze S, Gnjatic S, Ma'ayan A, Mocco J,  
562 Faries P, Merad M, Giannarelli C. 2019. Single-cell immune landscape of human  
563 atherosclerotic plaques. *Nat Med* 25: 1576-88
- 564 17. Wirka RC, Wagh D, Paik DT, Pjanic M, Nguyen T, Miller CL, Kundu R, Nagao M, Coller  
565 J, Koyano TK, Fong R, Woo YJ, Liu B, Montgomery SB, Wu JC, Zhu K, Chang R,  
566 Alamprese M, Tallquist MD, Kim JB, Quertermous T. 2019. Atheroprotective roles of  
567 smooth muscle cell phenotypic modulation and the TCF21 disease gene as revealed  
568 by single-cell analysis. *Nat Med* 25: 1280-9
- 569 18. Depuydt MA, Prange KH, Slenders L, Ord T, Elbersen D, Boltjes A, de Jager SC,  
570 Asselbergs FW, de Borst GJ, Aavik E, Lonnberg T, Lutgens E, Glass CK, den Ruijter  
571 HM, Kaikkonen MU, Bot I, Slutter B, van der Laan SW, Yla-Herttuala S, Mokry M,  
572 Kuiper J, de Winther MP, Pasterkamp G. 2020. Microanatomy of the Human  
573 Atherosclerotic Plaque by Single-Cell Transcriptomics. *Circ Res*
- 574 19. von Scheidt M, Zhao Y, Kurt Z, Pan C, Zeng L, Yang X, Schunkert H, Lusis AJ. 2017.  
575 Applications and Limitations of Mouse Models for Understanding Human  
576 Atherosclerosis. *Cell Metab* 25: 248-61
- 577 20. Stuart T, Butler A, Hoffman P, Hafemeister C, Papalexi E, Mauck WM, 3rd, Hao Y,  
578 Stoeckius M, Smibert P, Satija R. 2019. Comprehensive Integration of Single-Cell Data.  
579 *Cell* 177: 1888-902 e21
- 580 21. Korsunsky I, Millard N, Fan J, Slowikowski K, Zhang F, Wei K, Baglaenko Y, Brenner  
581 M, Loh PR, Raychaudhuri S. 2019. Fast, sensitive and accurate integration of single-  
582 cell data with Harmony. *Nat Methods* 16: 1289-96
- 583 22. Shafer MER. 2019. Cross-Species Analysis of Single-Cell Transcriptomic Data. *Front*  
584 *Cell Dev Biol* 7: 175
- 585 23. Vafadarnejad E, Rizzo G, Krampert L, Arampatzi P, Nugroho VA, Schulz D, Roesch M,  
586 Alayrac P, Vilar J, Silvestre J-S, Zerneck A, Saliba A-E, Cochain C. 2019. Time-  
587 resolved single-cell transcriptomics uncovers dynamics of cardiac neutrophil diversity  
588 in murine myocardial infarction. *bioRxiv*: 738005
- 589 24. Fernandez DM, Rahman AH, Fernandez NF, Chudnovskiy A, Amir ED, Amadori L,  
590 Khan NS, Wong CK, Shamailova R, Hill CA, Wang Z, Remark R, Li JR, Pina C, Faries  
591 C, Awad AJ, Moss N, Bjorkegren JLM, Kim-Schulze S, Gnjatic S, Ma'ayan A, Mocco J,  
592 Faries P, Merad M, Giannarelli C. 2019. Single-cell immune landscape of human  
593 atherosclerotic plaques. *Nat Med*
- 594 25. Heberle H, Meirelles GV, da Silva FR, Telles GP, Minghim R. 2015. InteractiVenn: a  
595 web-based tool for the analysis of sets through Venn diagrams. *BMC Bioinformatics*  
596 16: 169
- 597 26. Cole JE, Park I, Ahern DJ, Kassiteridi C, Danso Abeam D, Goddard ME, Green P,  
598 Maffia P, Monaco C. 2018. Immune cell census in murine atherosclerosis: cytometry  
599 by time of flight illuminates vascular myeloid cell diversity. *Cardiovasc Res* 114: 1360-  
600 71
- 601 27. Van Hove H, Martens L, Scheyltjens I, De Vlaminck K, Pombo Antunes AR, De Prijck  
602 S, Vandamme N, De Schepper S, Van Isterdael G, Scott CL, Aerts J, Berx G,  
603 Boeckxstaens GE, Vandenbroucke RE, Vereecke L, Moechars D, Guilliams M, Van  
604 Ginderachter JA, Saeys Y, Movahedi K. 2019. A single-cell atlas of mouse brain  
605 macrophages reveals unique transcriptional identities shaped by ontogeny and tissue  
606 environment. *Nat Neurosci* 22: 1021-35

- 607 28. Rizzo G, Vafadarnejad E, Arampatzi P, Silvestre J-S, Zerneck A, Saliba A-E, Cochain  
608 C. 2020. Single-cell transcriptomic profiling maps monocyte/macrophage transitions  
609 after myocardial infarction in mice. *bioRxiv*: 2020.04.14.040451
- 610 29. Nugent AA, Lin K, van Lengerich B, Lianoglou S, Przybyla L, Davis SS, Llapashtica C,  
611 Wang J, Kim DJ, Xia D, Lucas A, Baskaran S, Haddick PCG, Lenser M, Earr TK, Shi  
612 J, Dugas JC, Andreone BJ, Logan T, Solanoy HO, Chen H, Srivastava A, Poda SB,  
613 Sanchez PE, Watts RJ, Sandmann T, Astarita G, Lewcock JW, Monroe KM, Di Paolo  
614 G. 2020. TREM2 Regulates Microglial Cholesterol Metabolism upon Chronic  
615 Phagocytic Challenge. *Neuron* 105: 837-54 e9
- 616 30. Deczkowska A, Weiner A, Amit I. 2020. The Physiology, Pathology, and Potential  
617 Therapeutic Applications of the TREM2 Signaling Pathway. *Cell* 181: 1207-17
- 618 31. McArdle S, Buscher K, Ghosheh Y, Pramod AB, Miller J, Winkels H, Wolf D, Ley K.  
619 2019. Migratory and Dancing Macrophage Subsets in Atherosclerotic Lesions. *Circ Res*  
620 125: 1038-51
- 621 32. Weinberger T, Esfandyari D, Messerer D, Percin G, Schleifer C, Thaler R, Liu L,  
622 Stremmel C, Schneider V, Vagnozzi RJ, Schwanenkamp J, Fischer M, Busch K,  
623 Klapproth K, Ishikawa-Ankerhold H, Klosges L, Titova A, Molkentin JD, Kobayashi Y,  
624 Engelhardt S, Massberg S, Waskow C, Perdiguero EG, Schulz C. 2020. Ontogeny of  
625 arterial macrophages defines their functions in homeostasis and inflammation. *Nat*  
626 *Commun* 11: 4549
- 627 33. Menezes S, Melandri D, Anselmi G, Perchet T, Loschko J, Dubrot J, Patel R, Gautier  
628 EL, Hugues S, Longhi MP, Henry JY, Quezada SA, Lauvau G, Lennon-Dumenil AM,  
629 Gutierrez-Martinez E, Bessis A, Gomez-Perdiguero E, Jacome-Galarza CE, Garner H,  
630 Geissmann F, Golub R, Nussenzweig MC, Guermonprez P. 2016. The Heterogeneity  
631 of Ly6C(hi) Monocytes Controls Their Differentiation into iNOS(+) Macrophages or  
632 Monocyte-Derived Dendritic Cells. *Immunity* 45: 1205-18
- 633 34. Bosteels C, Neyt K, Vanheerswynghels M, van Helden MJ, Sichien D, Debeuf N, De  
634 Prijck S, Bosteels V, Vandamme N, Martens L, Saeys Y, Louagie E, Lesage M,  
635 Williams DL, Tang SC, Mayer JU, Ronchese F, Scott CL, Hammad H, Guillems M,  
636 Lambrecht BN. 2020. Inflammatory Type 2 cDCs Acquire Features of cDC1s and  
637 Macrophages to Orchestrate Immunity to Respiratory Virus Infection. *Immunity* 52:  
638 1039-56 e9
- 639 35. Leach SM, Gibbings SL, Tewari AD, Atif SM, Vestal B, Danhorn T, Janssen WJ, Wager  
640 TD, Jakubzick CV. 2020. Human and mouse transcriptome profiling identifies cross-  
641 species homology in pulmonary and lymph node mononuclear phagocytes. *bioRxiv*:  
642 2020.04.30.070839
- 643 36. Maier B, Leader AM, Chen ST, Tung N, Chang C, LeBerichel J, Chudnovskiy A,  
644 Maskey S, Walker L, Finnigan JP, Kirkling ME, Reizis B, Ghosh S, D'Amore NR,  
645 Bhardwaj N, Rothlin CV, Wolf A, Flores R, Marron T, Rahman AH, Kenigsberg E, Brown  
646 BD, Merad M. 2020. A conserved dendritic-cell regulatory program limits antitumour  
647 immunity. *Nature* 580: 257-62
- 648 37. Villani AC, Satija R, Reynolds G, Sarkizova S, Shekhar K, Fletcher J, Griesbeck M,  
649 Butler A, Zheng S, Lazo S, Jardine L, Dixon D, Stephenson E, Nilsson E, Grundberg I,  
650 McDonald D, Filby A, Li W, De Jager PL, Rozenblatt-Rosen O, Lane AA, Haniffa M,  
651 Regev A, Hacohen N. 2017. Single-cell RNA-seq reveals new types of human blood  
652 dendritic cells, monocytes, and progenitors. *Science* 356
- 653 38. Dutertre CA, Becht E, Irac SE, Khalilnezhad A, Narang V, Khalilnezhad S, Ng PY, van  
654 den Hoogen LL, Leong JY, Lee B, Chevrier M, Zhang XM, Yong PJA, Koh G, Lum J,  
655 Howland SW, Mok E, Chen J, Larbi A, Tan HKK, Lim TKH, Karagianni P, Tzioufas AG,  
656 Malleret B, Brody J, Albani S, van Roon J, Radstake T, Newell EW, Ginhoux F. 2019.  
657 Single-Cell Analysis of Human Mononuclear Phagocytes Reveals Subset-Defining  
658 Markers and Identifies Circulating Inflammatory Dendritic Cells. *Immunity* 51: 573-89  
659 e8
- 660 39. Yahagi K, Kolodgie FD, Otsuka F, Finn AV, Davis HR, Joner M, Virmani R. 2016.  
661 Pathophysiology of native coronary, vein graft, and in-stent atherosclerosis. *Nat Rev*  
662 *Cardiol* 13: 79-98

- 663 40. Otsuka F, Joner M, Prati F, Virmani R, Narula J. 2014. Clinical classification of plaque  
664 morphology in coronary disease. *Nat Rev Cardiol* 11: 379-89
- 665 41. Virmani R, Kolodgie FD, Burke AP, Farb A, Schwartz SM. 2000. Lessons from sudden  
666 coronary death: a comprehensive morphological classification scheme for  
667 atherosclerotic lesions. *Arterioscler Thromb Vasc Biol* 20: 1262-75
- 668 42. Clement M, Basatemur G, Masters L, Baker L, Bruneval P, Iwawaki T, Kneilling M,  
669 Yamasaki S, Goodall J, Mallat Z. 2016. Necrotic Cell Sensor Clec4e Promotes a  
670 Proatherogenic Macrophage Phenotype Through Activation of the Unfolded Protein  
671 Response. *Circulation* 134: 1039-51
- 672 43. Keren-Shaul H, Spinrad A, Weiner A, Matcovitch-Natan O, Dvir-Szternfeld R, Ulland  
673 TK, David E, Baruch K, Lara-Astaiso D, Toth B, Itzkovitz S, Colonna M, Schwartz M,  
674 Amit I. 2017. A Unique Microglia Type Associated with Restricting Development of  
675 Alzheimer's Disease. *Cell* 169: 1276-90 e17
- 676 44. Nugent AA, Lin K, van Lengerich B, Lianoglou S, Przybyla L, Davis SS, Llapashtica C,  
677 Wang J, Kim DJ, Xia D, Lucas A, Baskaran S, Haddick PCG, Lenser M, Earr TK, Shi  
678 J, Dugas JC, Andreone BJ, Logan T, Solanoy HO, Chen H, Srivastava A, Poda SB,  
679 Sanchez PE, Watts RJ, Sandmann T, Astarita G, Lewcock JW, Monroe KM, Di Paolo  
680 G. 2019. TREM2 Regulates Microglial Cholesterol Metabolism upon Chronic  
681 Phagocytic Challenge. *Neuron*
- 682 45. Xiong X, Kuang H, Ansari S, Liu T, Gong J, Wang S, Zhao XY, Ji Y, Li C, Guo L, Zhou  
683 L, Chen Z, Leon-Mimila P, Chung MT, Kurabayashi K, Opp J, Campos-Perez F,  
684 Villamil-Ramirez H, Canizales-Quinteros S, Lyons R, Lumeng CN, Zhou B, Qi L,  
685 Huertas-Vazquez A, Lusic AJ, Xu XZS, Li S, Yu Y, Li JZ, Lin JD. 2019. Landscape of  
686 Intercellular Crosstalk in Healthy and NASH Liver Revealed by Single-Cell Secretome  
687 Gene Analysis. *Mol Cell* 75: 644-60 e5
- 688 46. Remmerie A, Martens L, Thone T, Castoldi A, Seurinck R, Pavie B, Roels J, Vanneste  
689 B, De Prijck S, Vanhockerhout M, Binte Abdul Latib M, Devisscher L, Hoorens A,  
690 Bonnardel J, Vandamme N, Kremer A, Borghgraef P, Van Vlierberghe H, Lippens S,  
691 Pearce E, Saeys Y, Scott CL. 2020. Osteopontin Expression Identifies a Subset of  
692 Recruited Macrophages Distinct from Kupffer Cells in the Fatty Liver. *Immunity* 53: 641-  
693 57 e14
- 694 47. Ramachandran P, Dobie R, Wilson-Kanamori JR, Dora EF, Henderson BEP, Luu NT,  
695 Portman JR, Matchett KP, Brice M, Marwick JA, Taylor RS, Efremova M, Vento-Tormo  
696 R, Carragher NO, Kendall TJ, Fallowfield JA, Harrison EM, Mole DJ, Wigmore SJ,  
697 Newsome PN, Weston CJ, Iredale JP, Tacke F, Pollard JW, Ponting CP, Marioni JC,  
698 Teichmann SA, Henderson NC. 2019. Resolving the fibrotic niche of human liver  
699 cirrhosis at single-cell level. *Nature* 575: 512-8
- 700 48. Jaitin DA, Adlung L, Thaiss CA, Weiner A, Li B, Descamps H, Lundgren P, Bleriot C,  
701 Liu Z, Deczkowska A, Keren-Shaul H, David E, Zmora N, Eldar SM, Lubezky N,  
702 Shibolet O, Hill DA, Lazar MA, Colonna M, Ginhoux F, Shapiro H, Elinav E, Amit I.  
703 2019. Lipid-Associated Macrophages Control Metabolic Homeostasis in a Trem2-  
704 Dependent Manner. *Cell* 178: 686-98 e14
- 705 49. Zhou Y, Song WM, Andhey PS, Swain A, Levy T, Miller KR, Poliani PL, Cominelli M,  
706 Grover S, Gilfillan S, Cella M, Ulland TK, Zaitsev K, Miyashita A, Ikeuchi T, Sainouchi  
707 M, Kakita A, Bennett DA, Schneider JA, Nichols MR, Beausoleil SA, Ulrich JD,  
708 Holtzman DM, Artyomov MN, Colonna M. 2020. Human and mouse single-nucleus  
709 transcriptomics reveal TREM2-dependent and TREM2-independent cellular responses  
710 in Alzheimer's disease. *Nat Med* 26: 131-42
- 711 50. Thrupp N, Frigerio CS, Wolfs L, Skene NG, Poovathingal S, Fourné Y, Matthews PM,  
712 Theys T, Mancuso R, de Strooper B, Fiers M. 2020. Single nucleus sequencing fails to  
713 detect microglial activation in human tissue. *bioRxiv*: 2020.04.13.035386
- 714 51. Krasemann S, Madore C, Cialic R, Baufeld C, Calcagno N, El Fatimy R, Beckers L,  
715 O'Loughlin E, Xu Y, Fanek Z, Greco DJ, Smith ST, Tweet G, Humulock Z, Zrzavy T,  
716 Conde-Sanroman P, Gacias M, Weng Z, Chen H, Tjon E, Mazaheri F, Hartmann K,  
717 Madi A, Ulrich JD, Glatzel M, Worthmann A, Heeren J, Budnik B, Lemere C, Ikezu T,  
718 Heppner FL, Litvak V, Holtzman DM, Lassmann H, Weiner HL, Ochando J, Haass C,

- 719 Butovsky O. 2017. The TREM2-APOE Pathway Drives the Transcriptional Phenotype  
720 of Dysfunctional Microglia in Neurodegenerative Diseases. *Immunity* 47: 566-81 e9
- 721 52. Stoeckius M, Zheng S, Houck-Loomis B, Hao S, Yeung BZ, Mauck WM, 3rd, Smibert  
722 P, Satija R. 2018. Cell Hashing with barcoded antibodies enables multiplexing and  
723 doublet detection for single cell genomics. *Genome Biol* 19: 224
- 724 53. McGinnis CS, Patterson DM, Winkler J, Conrad DN, Hein MY, Srivastava V, Hu JL,  
725 Murrow LM, Weissman JS, Werb Z, Chow ED, Gartner ZJ. 2019. MULTI-seq: sample  
726 multiplexing for single-cell RNA sequencing using lipid-tagged indices. *Nat Methods*  
727 16: 619-26
- 728 54. Molgora M, Esaulova E, Vermi W, Hou J, Chen Y, Luo J, Brioschi S, Bugatti M, Omodei  
729 AS, Ricci B, Fronick C, Panda SK, Takeuchi Y, Gubin MM, Faccio R, Cella M, Gilfillan  
730 S, Unanue ER, Artyomov MN, Schreiber RD, Colonna M. 2020. TREM2 Modulation  
731 Remodels the Tumor Myeloid Landscape Enhancing Anti-PD-1 Immunotherapy. *Cell*
- 732 55. Katzenelenbogen Y, Sheban F, Yalin A, Yofe I, Svetlichnyy D, Jaitin DA, Bornstein C,  
733 Moshe A, Keren-Shaul H, Cohen M, Wang SY, Li B, David E, Salame TM, Weiner A,  
734 Amit I. 2020. Coupled scRNA-Seq and Intracellular Protein Activity Reveal an  
735 Immunosuppressive Role of TREM2 in Cancer. *Cell*
- 736 56. N AG, Bensinger SJ, Hong C, Beceiro S, Bradley MN, Zelcer N, Deniz J, Ramirez C,  
737 Diaz M, Gallardo G, de Galarreta CR, Salazar J, Lopez F, Edwards P, Parks J, Andujar  
738 M, Tontonoz P, Castrillo A. 2009. Apoptotic cells promote their own clearance and  
739 immune tolerance through activation of the nuclear receptor LXR. *Immunity* 31: 245-58
- 740 57. Liu Z, Gu Y, Chakarov S, Bleriot C, Kwok I, Chen X, Shin A, Huang W, Dress RJ,  
741 Dutertre CA, Schlitzer A, Chen J, Ng LG, Wang H, Liu Z, Su B, Ginhoux F. 2019. Fate  
742 Mapping via Ms4a3-Expression History Traces Monocyte-Derived Cells. *Cell* 178:  
743 1509-25 e19
- 744 58. Werner Y, Mass E, Ashok Kumar P, Ulas T, Handler K, Horne A, Klee K, Lupp A,  
745 Schutz D, Saaber F, Redecker C, Schultze JL, Geissmann F, Stumm R. 2020. Cxcr4  
746 distinguishes HSC-derived monocytes from microglia and reveals monocyte immune  
747 responses to experimental stroke. *Nat Neurosci* 23: 351-62
- 748 59. Alsaigh T, Evans D, Frankel D, Torkamani A. 2020. Decoding the transcriptome of  
749 atherosclerotic plaque at single-cell resolution. *bioRxiv*: 2020.03.03.968123
- 750 60. Rodriques SG, Stickels RR, Goeva A, Martin CA, Murray E, Vanderburg CR, Welch J,  
751 Chen LM, Chen F, Macosko EZ. 2019. Slide-seq: A scalable technology for measuring  
752 genome-wide expression at high spatial resolution. *Science* 363: 1463-7
- 753 61. Burke AP, Kolodgie FD, Zieske A, Fowler DR, Weber DK, Varghese PJ, Farb A,  
754 Virmani R. 2004. Morphologic findings of coronary atherosclerotic plaques in diabetics:  
755 a postmortem study. *Arterioscler Thromb Vasc Biol* 24: 1266-71
- 756 62. Fairweather D. 2014. Sex differences in inflammation during atherosclerosis. *Clin Med*  
757 *Insights Cardiol* 8: 49-59
- 758 63. Wendorff C, Wendorff H, Pelisek J, Tsantilas P, Zimmermann A, Zerneck A, Kuehnl  
759 A, Eckstein HH. 2015. Carotid Plaque Morphology Is Significantly Associated With Sex,  
760 Age, and History of Neurological Symptoms. *Stroke* 46: 3213-9
- 761 64. Mereu E, Lafzi A, Moutinho C, Ziegenhain C, MacCarthy DJ, Alvarez A, Batlle E, Sagar,  
762 Grün D, Lau JK, Boutet SC, Sanada C, Ooi A, Jones RC, Kaihara K, Brampton C,  
763 Talaga Y, Sasagawa Y, Tanaka K, Hayashi T, Nikaido I, Fischer C, Sauer S, Trefzer  
764 T, Conrad C, Adiconis X, Nguyen LT, Regev A, Levin JZ, Parekh S, Janjic A, Wange  
765 LE, Bagnoli JW, Enard W, Gut M, Sandberg R, Gut I, Stegle O, Heyn H. 2019.  
766 Benchmarking Single-Cell RNA Sequencing Protocols for Cell Atlas Projects. *bioRxiv*:  
767 630087
- 768 65. van den Brink SC, Sage F, Vertesy A, Spanjaard B, Peterson-Maduro J, Baron CS,  
769 Robin C, van Oudenaarden A. 2017. Single-cell sequencing reveals dissociation-  
770 induced gene expression in tissue subpopulations. *Nat Methods* 14: 935-6

771

772

773 **FIGURE LEGENDS**

774 **Figure 1: integrated scRNA-seq analysis of vascular inflammation in mouse**  
775 **atherosclerotic aortas. A)** UMAP representation of integrated scRNA-seq gene expression  
776 data in 22,852 cells from mouse atherosclerotic aortas with identification of the major immune  
777 cell lineages (DC: dendritic cells; gdT: gammadelta T cells); **B)** projection of single cells in the  
778 UMAP space according to dataset and experimental condition of origin. **C)** Expression of the  
779 indicated transcripts projected onto the UMAP plot. **D)** UMAP plot of the mononuclear  
780 phagocyte data subset with clustering analysis; **E)** expression of the indicated transcripts  
781 projected onto the UMAP plot; **F)** dot plot of average gene expression of the indicated marker  
782 transcripts in the macrophage clusters.

783 **Figure 2: Characterisation of subpopulations within *Trem2<sup>hi</sup>* macrophages and their**  
784 **relationships to Mac-AIR. A)** projection of cells corresponding to steady state C57BL6 aorta  
785 Mac-AIR cells (Williams, Nat Immunol 2020) on the UMAP plot and **B)** high-resolution re-  
786 clustering identifying an independent cluster with a Mac-AIR signature; **C)** dot plot showing  
787 average expression of selected marker genes in Mac-AIR, Foamy/*Trem2<sup>hi</sup>Gpnmb* and  
788 Foamy/*Trem2<sup>hi</sup>Slamf9* populations; **D)** expression of the indicated transcripts in Mac-AIR,  
789 Foamy/*Trem2<sup>hi</sup>Gpnmb* and Foamy/*Trem2<sup>hi</sup>Slamf9* populations; **E)** UMAP plot with  
790 identification of macrophage subclusters including the Mac-AIR signature cluster, split  
791 according to dataset of origin ; **F)** fraction of Mac-AIR, Foamy/*Trem2<sup>hi</sup>Gpnmb* and  
792 Foamy/*Trem2<sup>hi</sup>Slamf9* populations among total aortic mononuclear phagocytes (MPCs). For  
793 consistency, not all datasets were used in **F**: datasets from *Apoe<sup>-/-</sup>* mice (Winkels et al. 2018)  
794 were excluded as chow fed *Apoe<sup>-/-</sup>* mice do not represent real non-atherosclerotic controls; the  
795 'Kim Foam Cell' dataset was excluded as it is technically enriched for foam cells; the 21 days  
796 HFD dataset from Williams et al. Nat Immunol 2020 was excluded as it represents a very early  
797 time point of lesion formation.

798 **Figure 3: integrated scRNA-seq analysis of macrophages in human atherosclerosis. A)**  
799 UMAP representation and clustering analysis of integrated scRNA-seq gene expression data  
800 in 2,890 human mononuclear phagocytes from atherosclerotic lesions; **B)** expression of C1QA  
801 and CD68 projected onto the UMAP plot; **C)** heatmap of averaged gene expression (top 10  
802 genes ordered by fold change) in the clusters (Inflamm.=Inflammatory); **D)** projection of single  
803 cells in the UMAP space according to patient of origin; **E)** fraction represented by each cluster  
804 within total cells from each patient (left) or vascular bed (right); **F)** DotPlot showing the  
805 expression of transcripts enriched in human Inflammatory-Mφ, Foamy-Mφ and LYVE1-Mφ  
806 that are also enriched in their putative mouse counterparts (i.e. mouse Inflammatory-Mφ,  
807 Foamy/*Trem2<sup>hi</sup>*Mφ, and Resident/Resident-like-Mφ respectively).

808 **Figure 4: Cross-species scRNA-seq integrated analysis of macrophages in murine and**  
809 **human atherosclerosis. A)** UMAP plot and clustering analysis (with annotation) of the  
810 mouse/human integrated data; **B)** cell species of origin projected onto the UMAP plot; **C)**  
811 heatmap of enriched genes in the integrated cluster (top 5 ordered by fold change); **D)**  
812 projection of the human-only clusters (see Figure 2) on the UMAP plot of the mouse/human  
813 integrated data; **E)** mapping of the human-only clusters in the mouse/human integrated  
814 clusters.



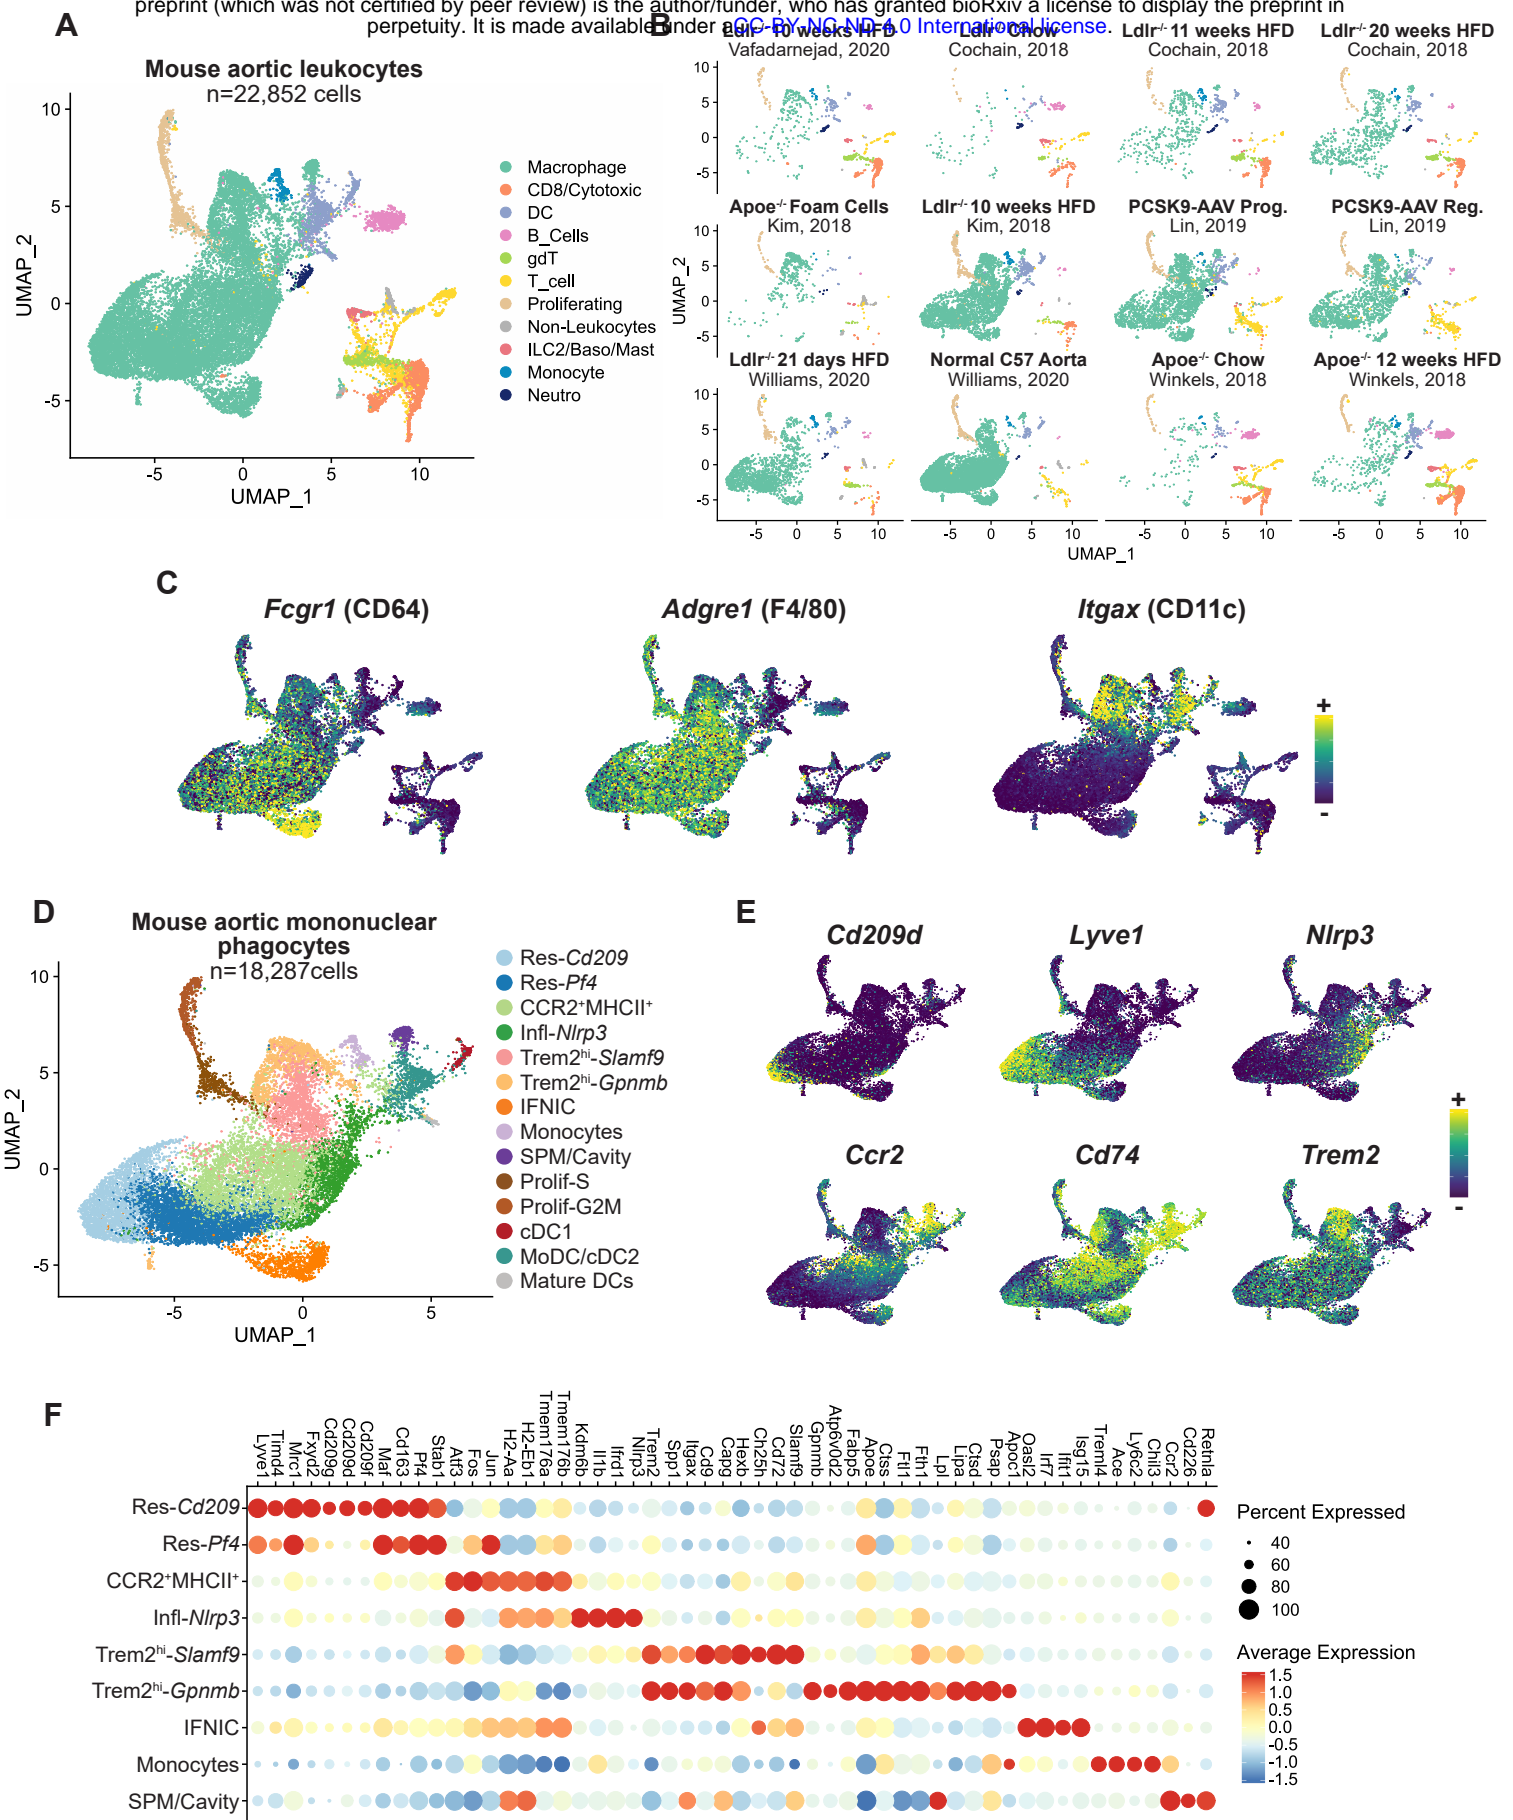

**Figure 1: integrated scRNA-seq analysis of vascular inflammation in mouse atherosclerotic aortas. A)** UMAP representation of integrated scRNA-seq gene expression data in 22,852 cells from mouse atherosclerotic aortas with identification of the major immune cell lineages (DC: dendritic cells; gdT: gammadelta T cells); **B)** projection of single cells in the UMAP space according to dataset and experimental condition of origin. **C)** Expression of the indicated transcripts projected onto the UMAP plot. **D)** UMAP plot of the mononuclear phagocyte data subset with clustering analysis; **E)** expression of the indicated transcripts projected onto the UMAP plot; **F)** dot plot of average gene expression of the indicated marker transcripts in the macrophage clusters.

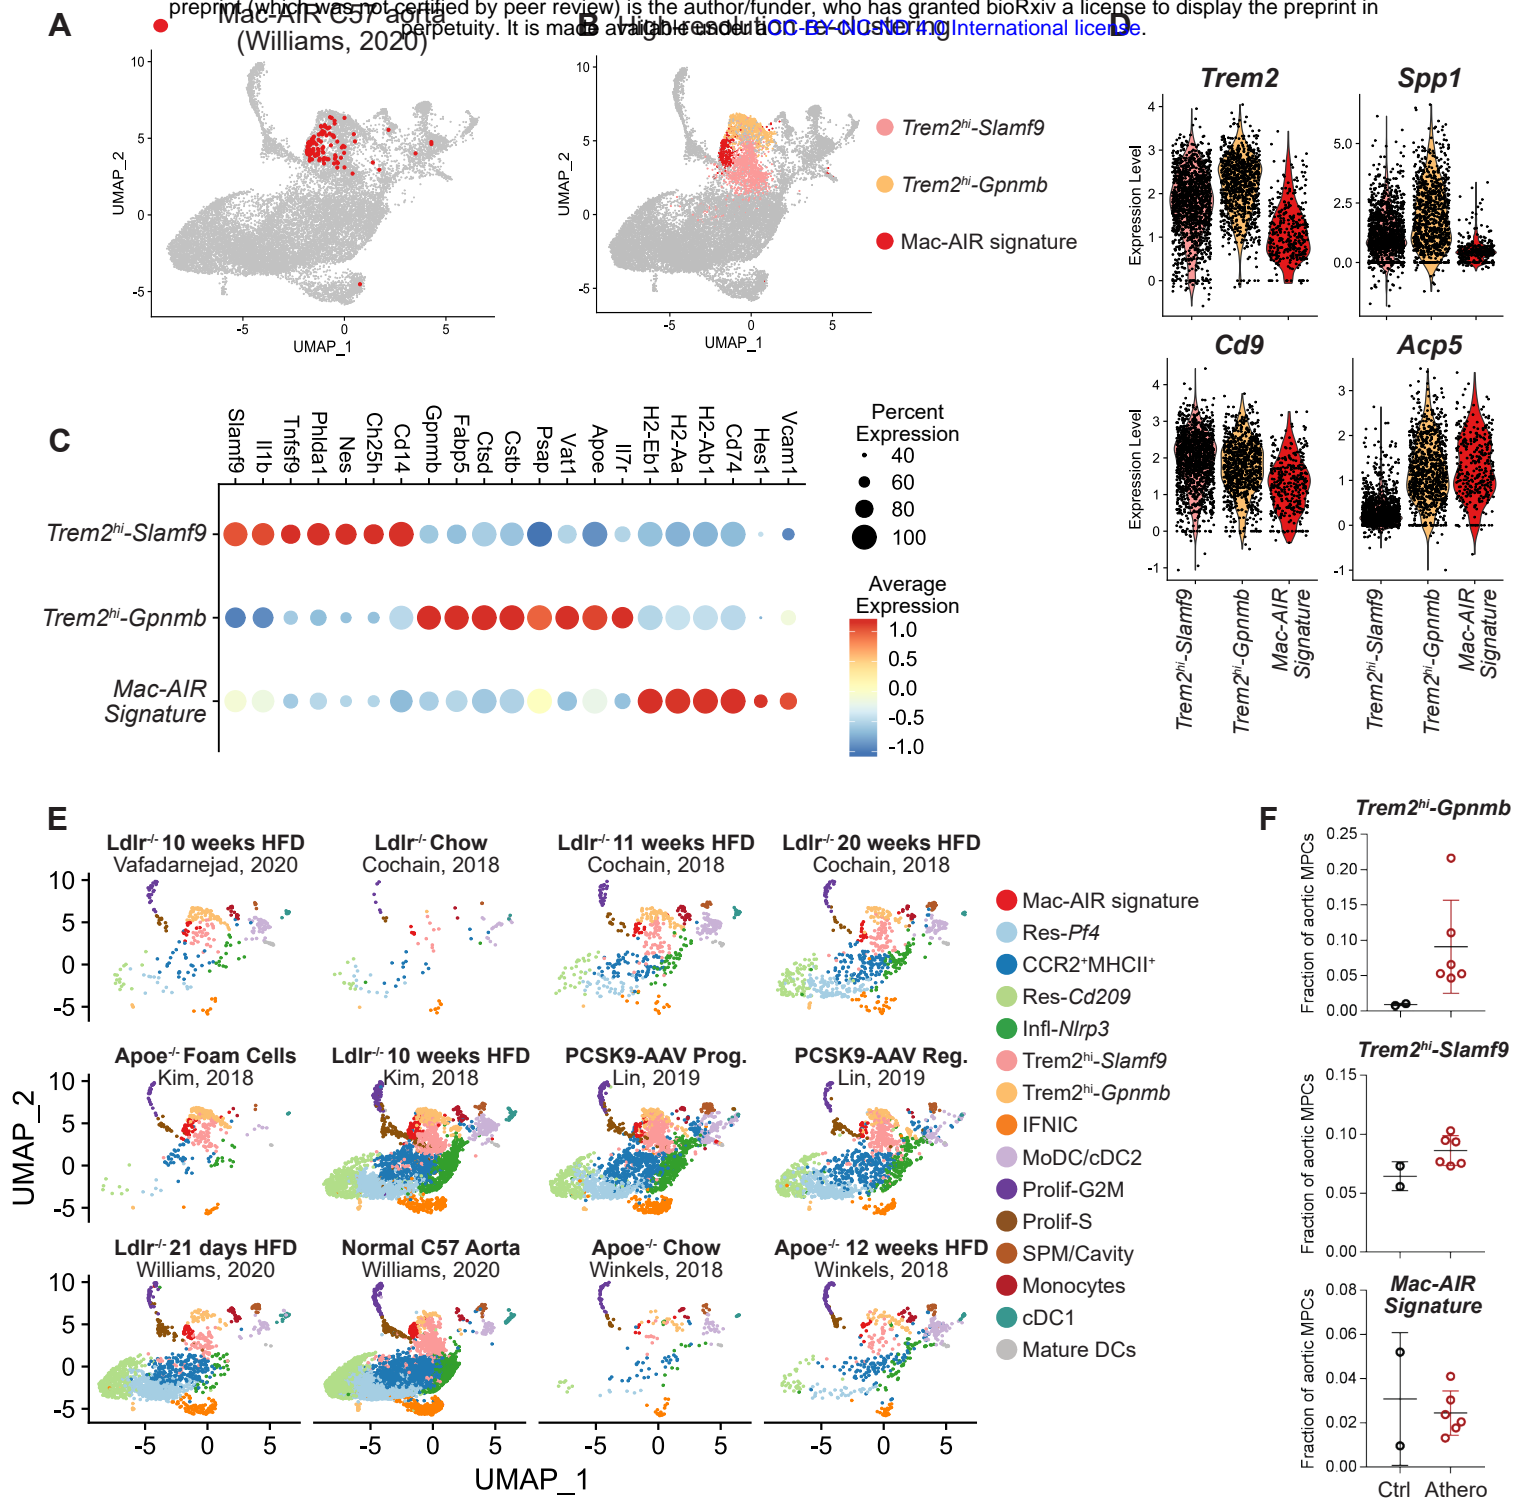

**Figure 2: Characterisation of subpopulations within *Trem2<sup>hi</sup>* macrophages and their relationships to Mac-AIR. **A**) projection of cells corresponding to steady state C57BL6 aorta Mac-AIR cells (Williams, Nat Immunol 2020) on the UMAP plot and **B**) high-resolution re-clustering identifying an independent cluster with a Mac-AIR signature; **C**) dot plot showing average expression of selected marker genes in Mac-AIR, Foamy/*Trem2<sup>hi</sup>-Gpnmb* and Foamy/*Trem2<sup>hi</sup>-Slamf9* populations; **D**) expression of the indicated transcripts in Mac-AIR, Foamy/*Trem2<sup>hi</sup>-Gpnmb* and Foamy/*Trem2<sup>hi</sup>-Slamf9* populations; **E**) UMAP plot with identification of macrophage subclusters including the Mac-AIR signature cluster, split according to dataset of origin ; **F**) fraction of Mac-AIR, Foamy/*Trem2<sup>hi</sup>-Gpnmb* and Foamy/*Trem2<sup>hi</sup>-Slamf9* populations among total aortic mononuclear phagocytes (MPCs). For consistency, not all datasets were used in **F**: datasets from *Apoe<sup>-/-</sup>* mice (Winkels et al. 2018) were excluded as chow fed *Apoe<sup>-/-</sup>* mice do not represent real non-atherosclerotic controls; the 'Kim Foam Cell' dataset was excluded as it is technically enriched for foam cells; the 21 days HFD dataset from Williams et al. Nat Immunol 2020 was excluded as it represents a very early time point of lesion formation.**

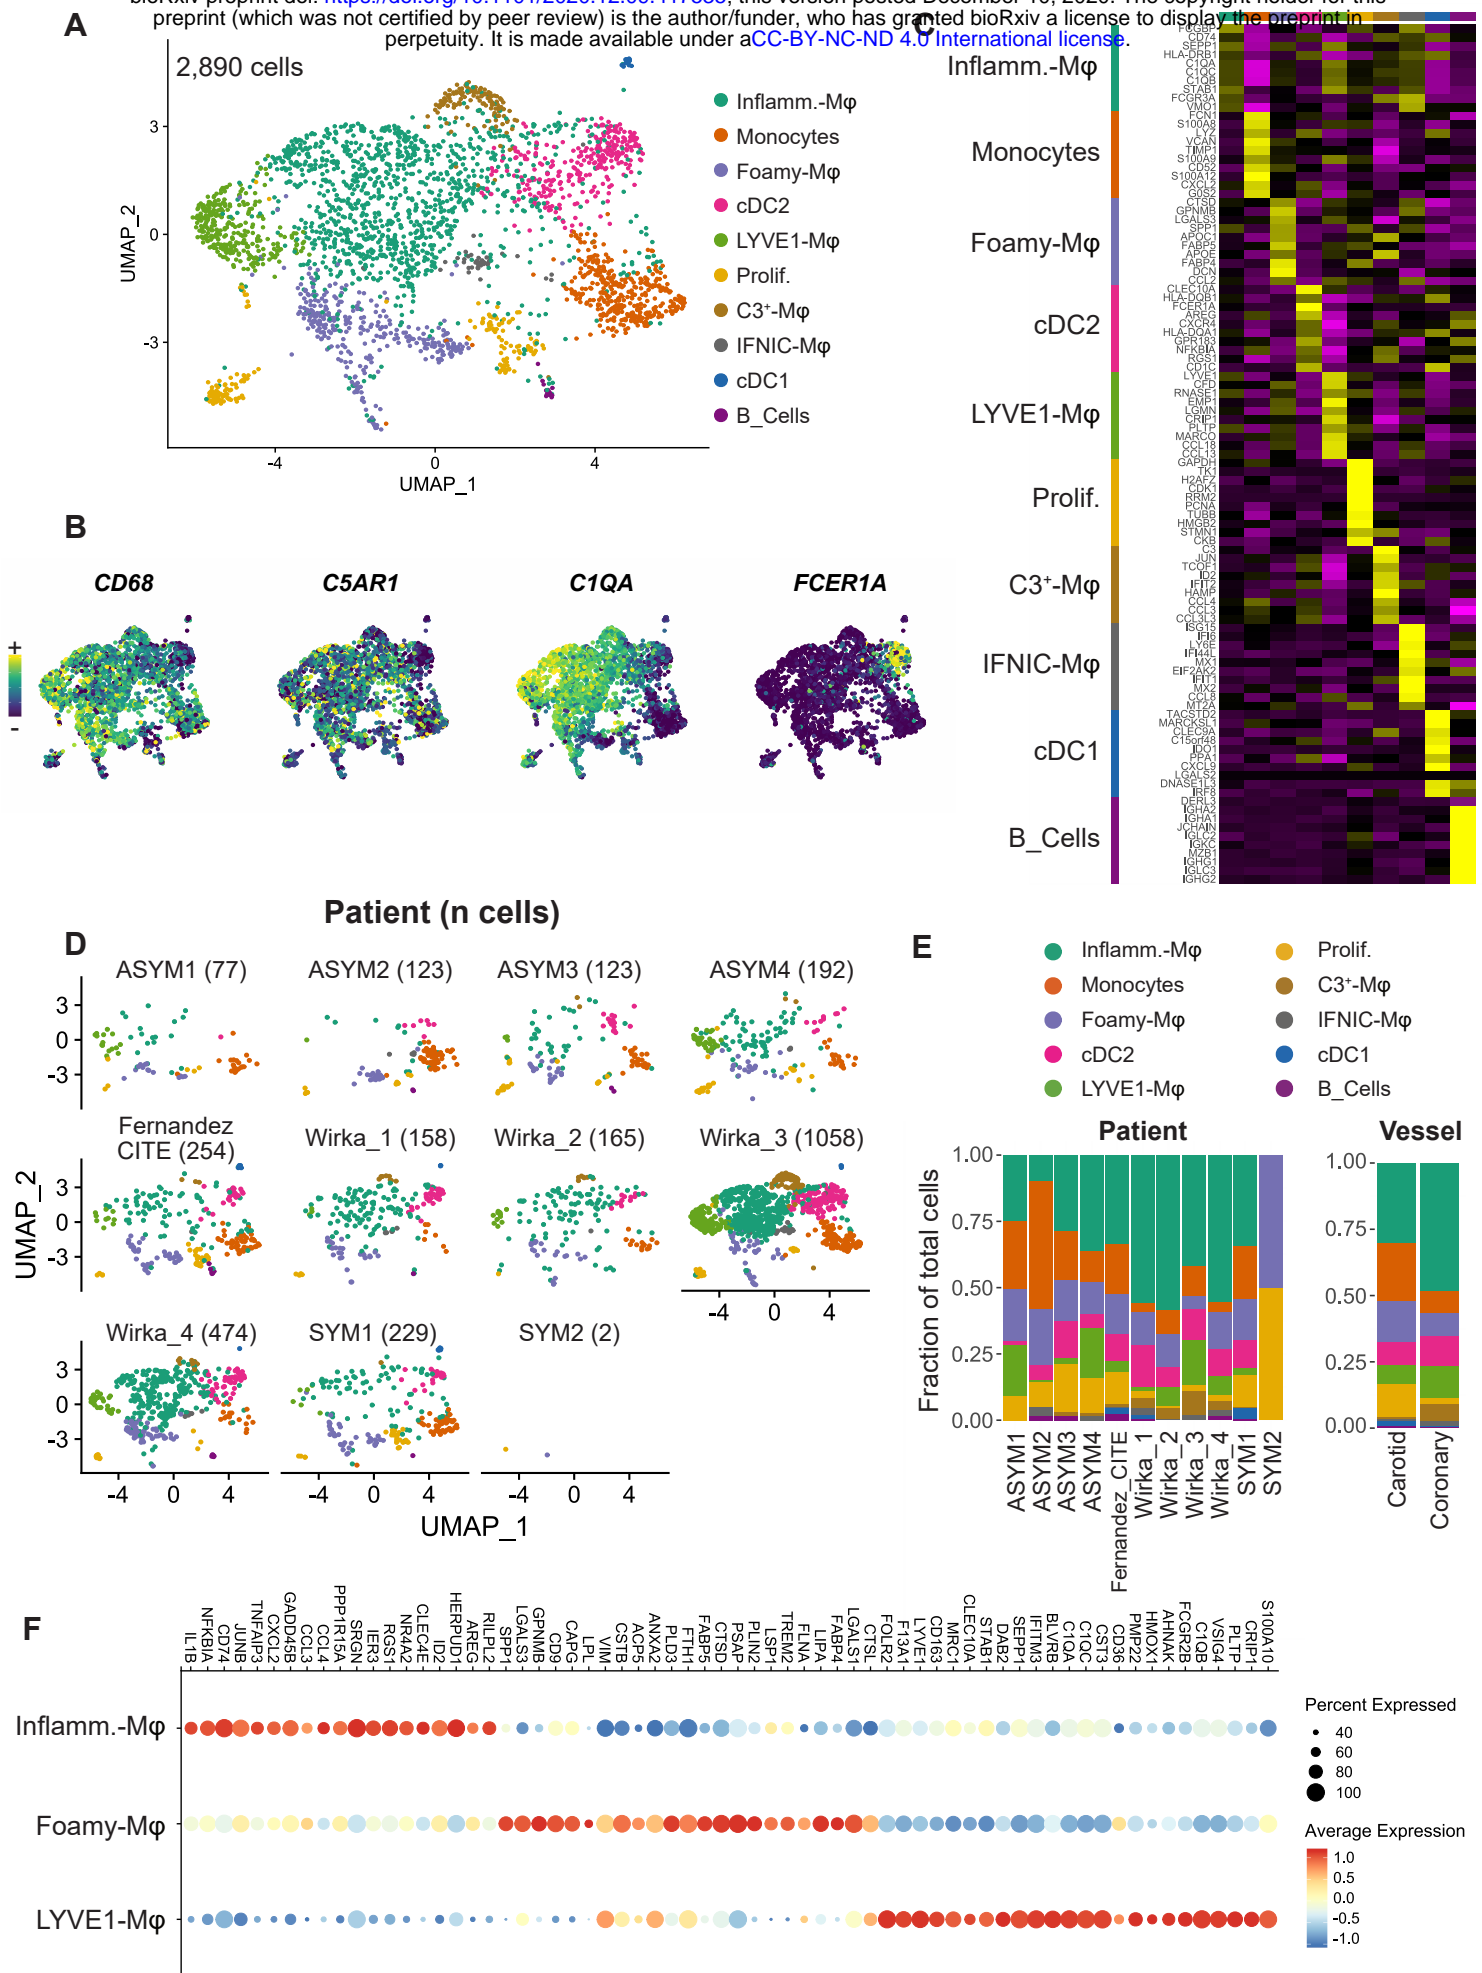

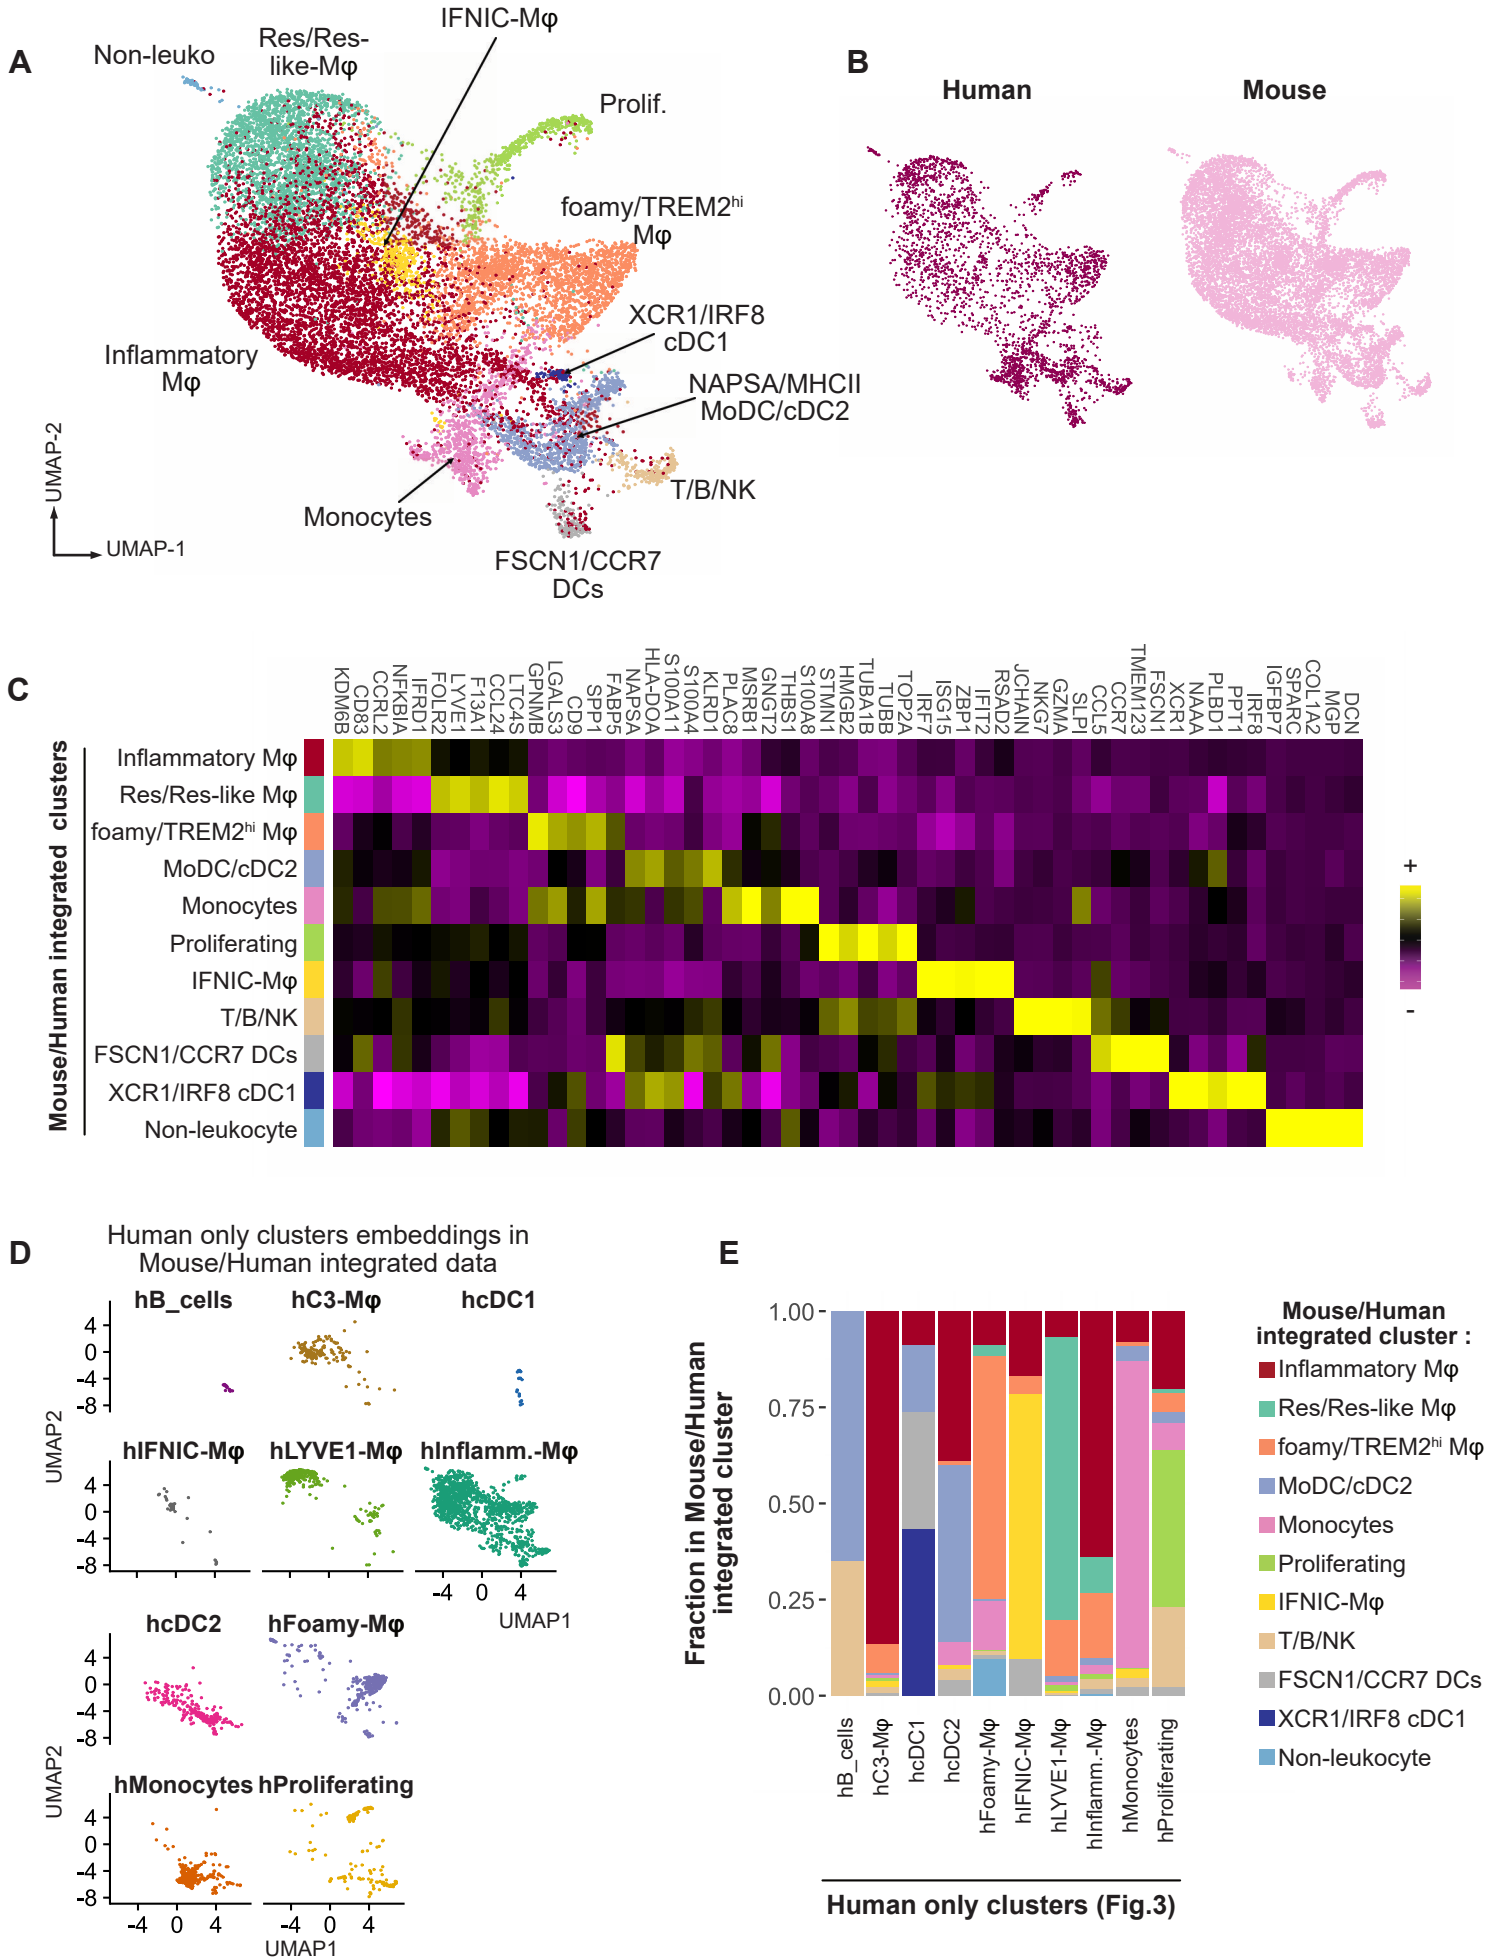

**Figure 4: Cross-species scRNA-seq integrated analysis of macrophages in murine and human atherosclerosis. A) UMAP plot and clustering analysis (with annotation) of the mouse/human integrated data; B) cell species of origin projected onto the UMAP plot; C) heatmap of enriched genes in the integrated cluster (top 5 ordered by fold change); D) projecton of the human-only clusters (see Figure 2) on the UMAP plot of the mouse/human integrated data; E) mapping of the human-only clusters in the mouse/human integrated clusters.**

| Reference                                                                        | Genotype/B background | Diet                                                           | Technology                     | Time points                                     | Sorting strategy                   | i.v. CD45 exclusion | Sex    |
|----------------------------------------------------------------------------------|-----------------------|----------------------------------------------------------------|--------------------------------|-------------------------------------------------|------------------------------------|---------------------|--------|
| Vafadarnejad, Circ Res 2020                                                      | Ldlr-/-               | 15% milk fat, 1.25% cholesterol;                               | 10x Genomics Single Cell 3' v2 | 10 weeks HFD                                    | Live CD45+                         | Yes                 | Male   |
| Cochain, Circ Res 2018                                                           | Ldlr-/-               | Normal Chow                                                    | 10x Genomics Single Cell 3' v2 | Chow diet                                       | Live CD45+                         | Yes                 | Male   |
| Cochain, Circ Res 2018                                                           | Ldlr-/-               | 15% milk fat, 1.25% cholesterol;                               | 10x Genomics Single Cell 3' v2 | 11 weeks HFD                                    | Live CD45+                         | Yes                 | Male   |
| Cochain, Circ Res 2018                                                           | Ldlr-/-               | 15% milk fat, 1.25% cholesterol;                               | 10x Genomics Single Cell 3' v2 | 20 weeks                                        | Live CD45+                         | Yes                 | Male   |
| Kim, Circ Res 2018                                                               | ApoE-/-               | 49.9% carbohydrates, 17.4% protein, 20% fat, 0.15% cholesterol | 10x Genomics Single Cell 3' v2 | 27 weeks HFD                                    | Intimal BODIPY <sup>hi</sup> cells | No                  | Male   |
| Kim, Circ Res 2018                                                               | Ldlr-/-               | 49.9% carbohydrates, 17.4% protein, 20% fat, 0.15% cholesterol | 10x Genomics Single Cell 3' v2 | 10 weeks HFD                                    | Live CD11b+                        | No                  | Male   |
| Lin, JCI Insight 2019                                                            | C57BL6*; PCSK9-AAV    | Western Diet; (Dyets Inc. #101977)                             | 10x Genomics Single Cell 3' v2 | 18+2 weeks HFD (progression)                    | CD11b+TdTomo+ macrophages**        | No                  | Male   |
| Lin, JCI Insight 2019                                                            | C57BL6*; PCSK9-AAV    | Western Diet; (Dyets Inc. #101977)                             | 10x Genomics Single Cell 3' v2 | 18 weeks HFD+2 weeks chow/ApoB ASO (regression) | CD11b+TdTomo+ macrophages**        | No                  | Female |
| Williams, Nat Immunol 2020                                                       | Ldlr-/-               | Envigo TD.88137                                                | 10x Genomics Single Cell 3' v2 | 21 days HFD                                     | Live CD45+                         | No                  | Male   |
| Williams, Nat Immunol 2020                                                       | C57BL6/J              | Normal Chow                                                    | 10x Genomics Single Cell 3' v2 | Chow diet                                       | Live CD45+                         | No                  | Male   |
| Winkels, Circ Res 2018                                                           | ApoE-/-               | Normal Chow                                                    | 10x Genomics Single Cell 3' v2 | Chow diet                                       | Live CD45+                         | No                  | Female |
| Winkels, Circ Res 2018                                                           | ApoE-/-               | 0.2% cholesterol Envigo TD88137                                | 10x Genomics Single Cell 3' v2 | 12 weeks HFD                                    | Live CD45+                         | No                  | Female |
| *B6.Cx3cr1CreERT2-EYFP/+Rosa26-tdTomato/+ ; C57BL6 background                    |                       |                                                                |                                |                                                 |                                    |                     |        |
| **2 weeks post Tamoxifen gavage in B6.Cx3cr1CreERT2-EYFP/+Rosa26-tdTomato/+ mice |                       |                                                                |                                |                                                 |                                    |                     |        |

**Table S1**

## A- Mouse data integration (Figure 1-2)

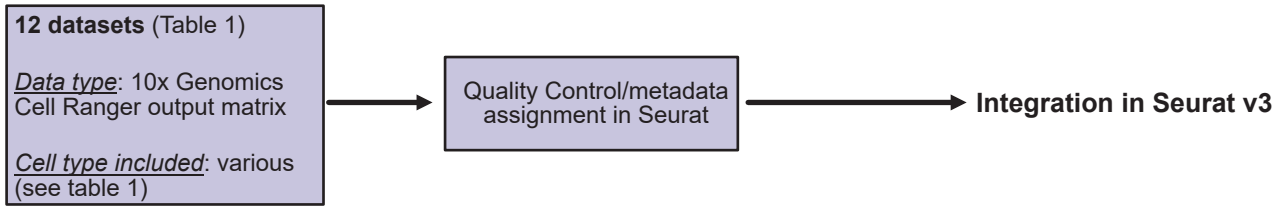

## B- Human data integration (Figure 3)

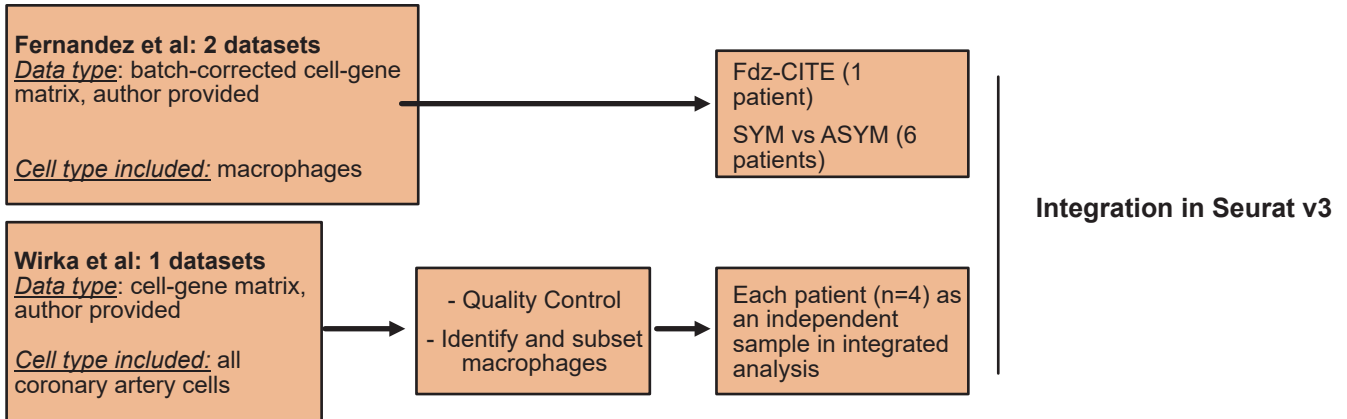

## C- Mouse/Human data integration (Figure 4)

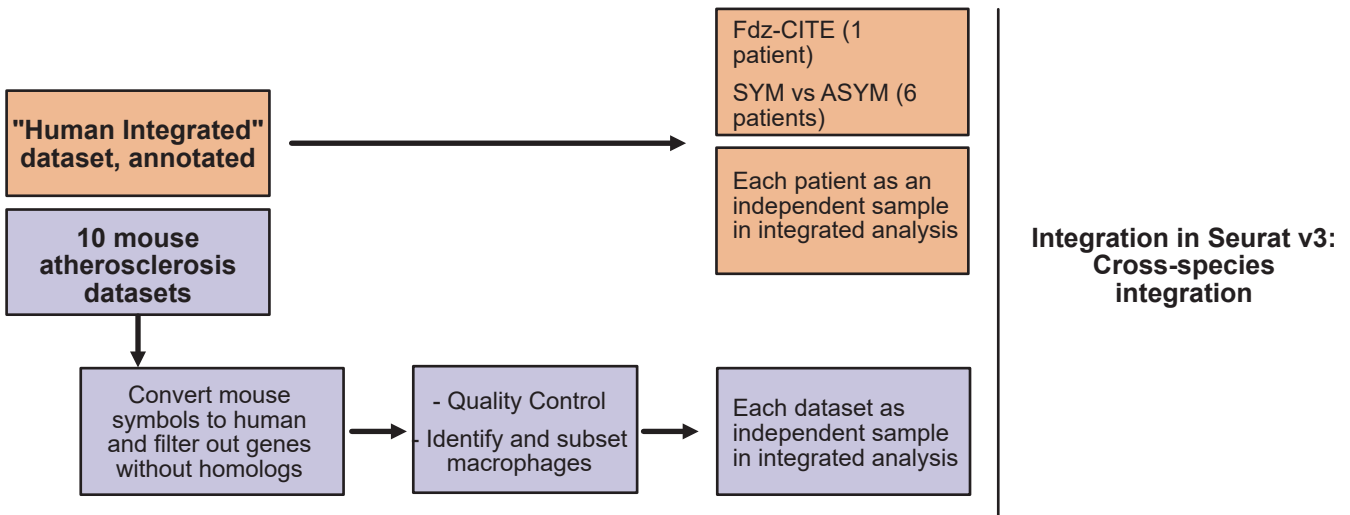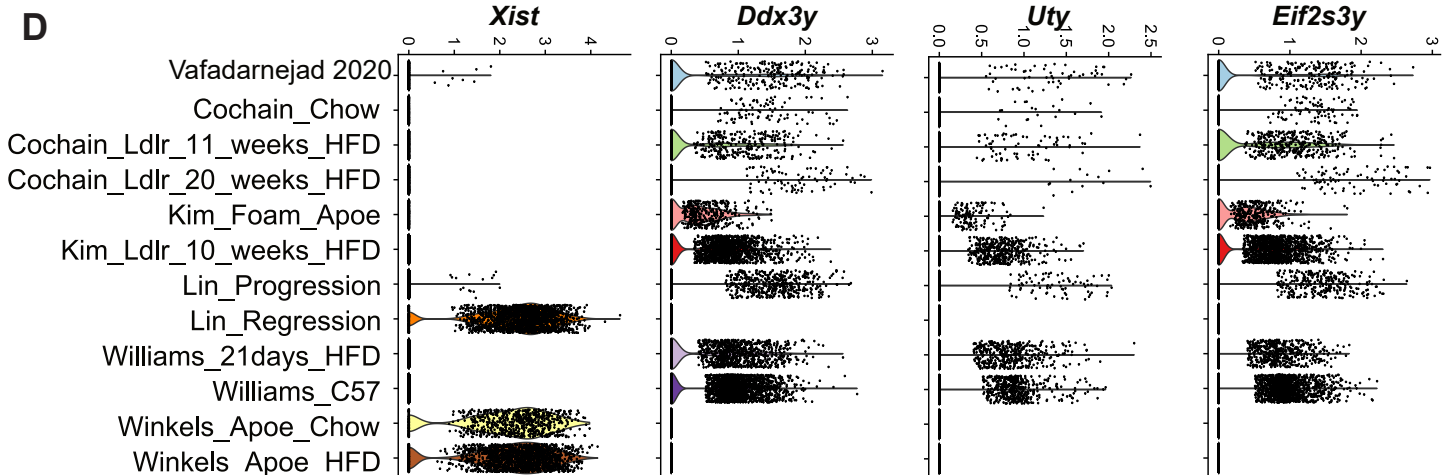

**Figure S1: A-C schematic representation of the integrated analysis procedure and D) analysis of sex specific gene expression in mouse single-cell studies.**

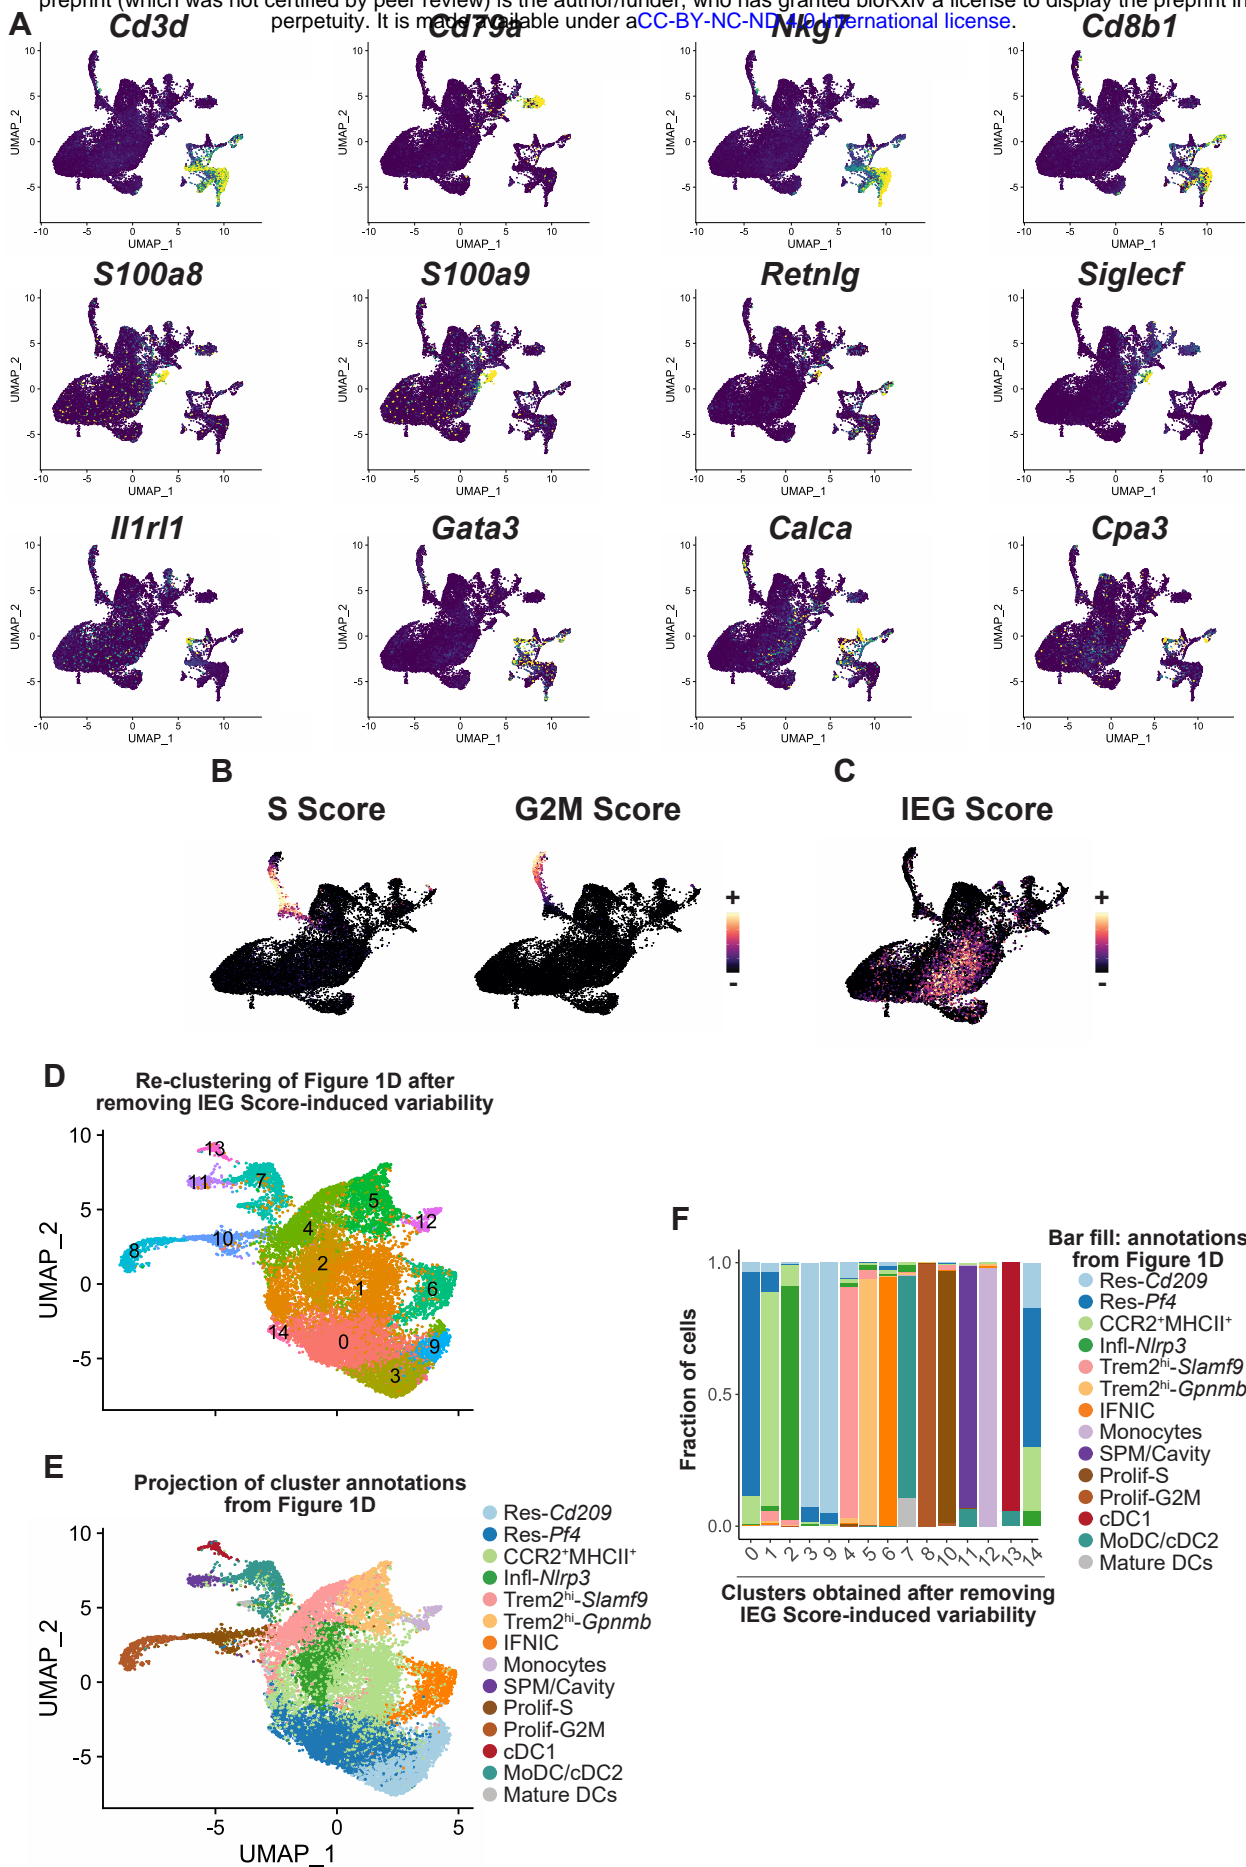

**Figure SII: Identification of immune cell lineages, cell cycle phase and immediate early genes expression in aortic immune cells (related to Figure 1).** **A)** expression of the indicated transcripts identifying immune cell lineages projected onto the UMAP plot shown in Figure 1A; **B)** S and G2M cell cycle score and **C)** Immediate Early Gene (IEG) expression score in mononuclear phagocytes projected onto the UMAP plot. **D-F)** re-clustering of mononuclear phagocytes after regressing out gene expression variability caused by IEG expression with **D)** UMAP plot of the new clustering analysis, **E)** projection of clusters obtained in **Figure 1D** on the new UMAP embeddings and **F)** distribution of the clusters obtained in **Figure 1D** across the clusters obtained after removing IEG Score-induced variability.

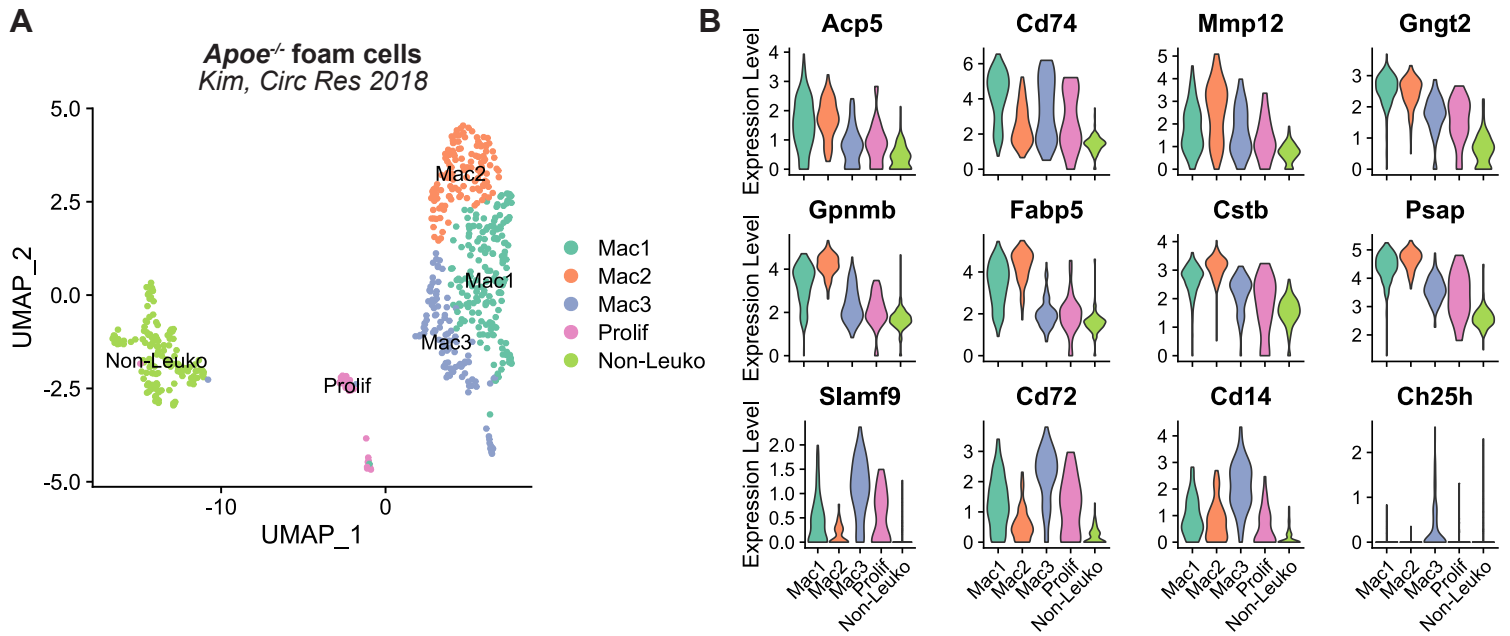

**Figure SIII: Analysis of scRNA-seq data from the *Apoe*<sup>-/-</sup> Foam Cell (Kim, 2018) data set alone (related to Figure 2). A) UMAP plot and cluster annotation (Mac=macrophage; Prolif: proliferating; non-leuko=non leukocyte) and B) expression of the indicated transcripts in the different clusters (prolif=proliferating)**



**A**

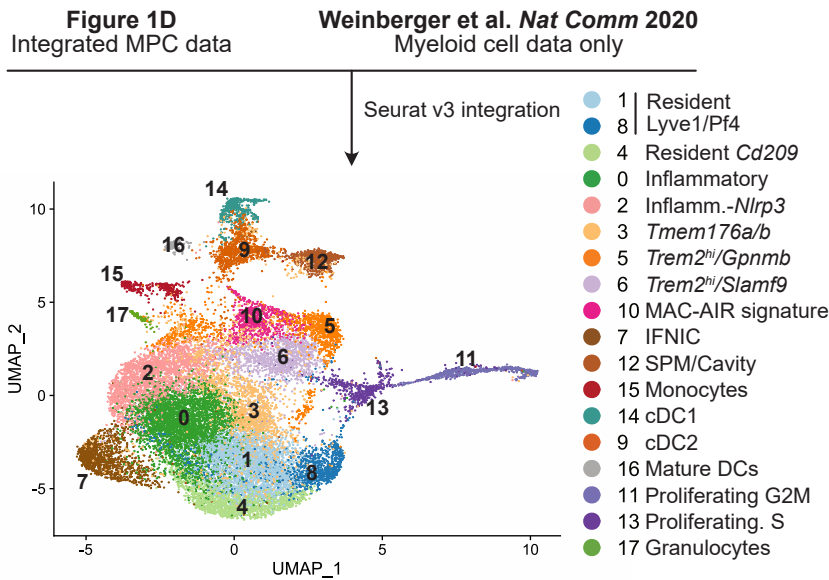

**B**

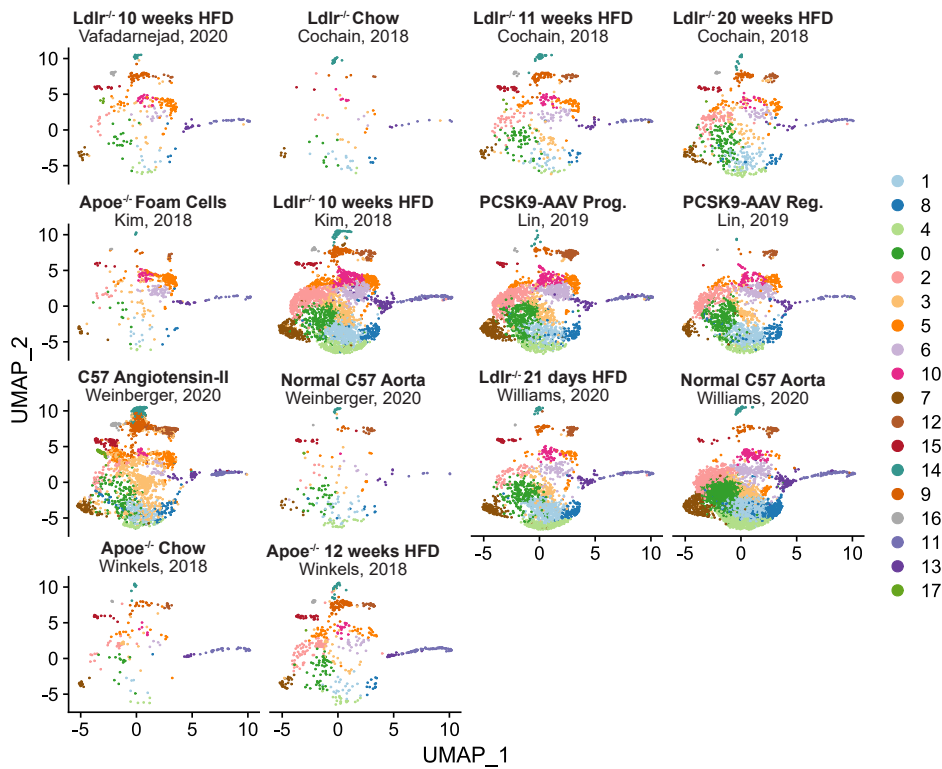

**C**

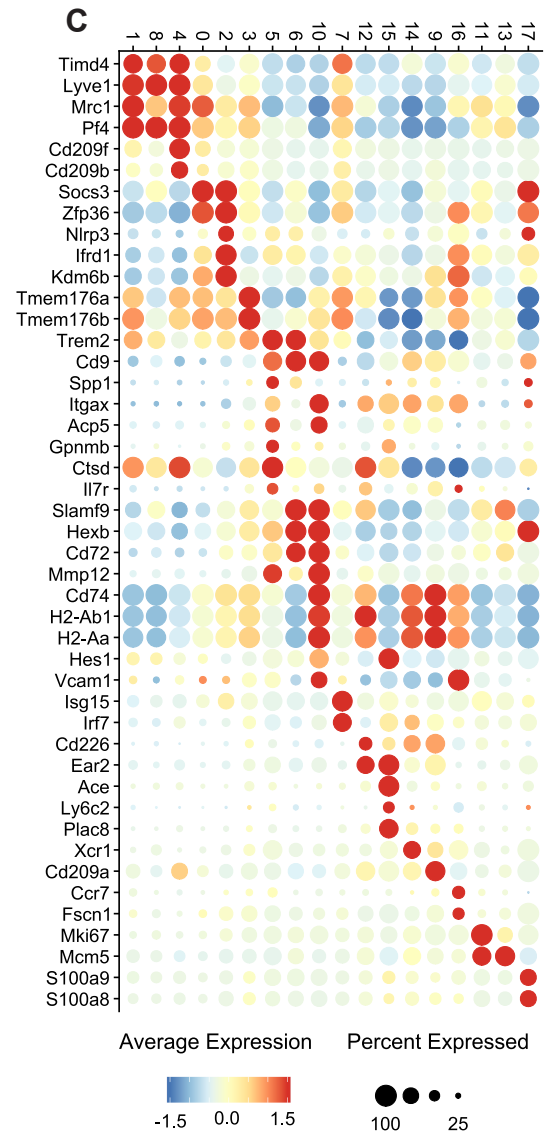

**Figure SIV: Identification of mononuclear phagocyte subsets in AngII induced aortic inflammation (related to Figure 1 and 2).** The integrated mononuclear phagocyte dataset (Figure 1D) was integrated with myeloid cell scRNA-seq data from Weinberger et al. Nature Communications 2020. **A)** UMAP plot with color-coded identification of clusters and **B)** UMAP-plot splitted by dataset of origin; **C)** dot plot showing average expression of selected marker genes in the clusters.

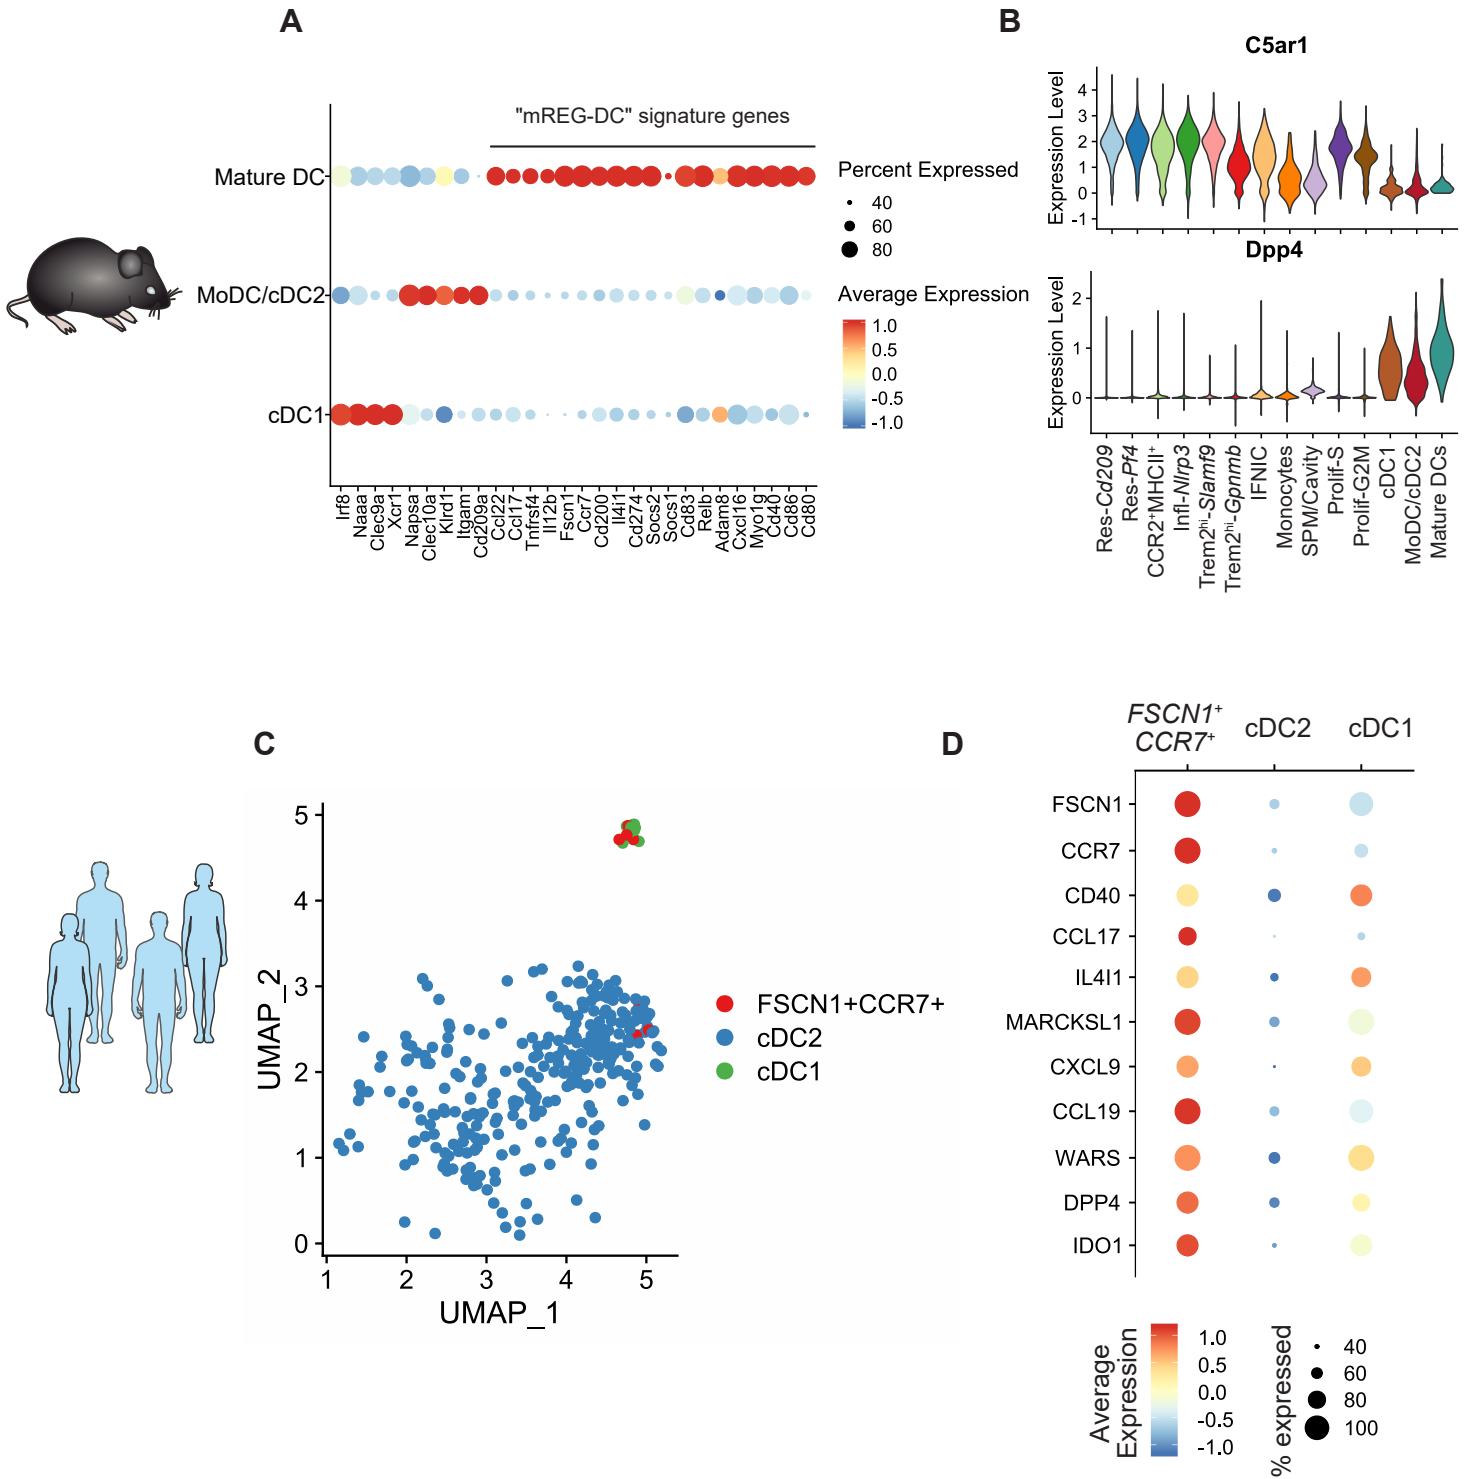

**Figure SV: Identification of the mREG-DC signature in mouse and human atherosclerosis. A)** Gene expression DotPlot in the 3 dendritic cell populations shows expression of "mregDC" signature genes in mature DCs. **B)** Violin plots showing expression of *Dpp4* (encoding CD26) and *C5ar1* (encoding CD88) in the mononuclear phagocyte subsets. **C)** Cells coexpressing *FSCN1* and *CCR7* (*FSCN1*<sup>+</sup>*CCR7*<sup>+</sup> DCs, n=10 cells) were manually selected in Seurat and are color coded on the UMAP plot (same coordinates as Figure 3A, only DC populations shown). **D)** Dot Plot showing average expression and proportion of expressing cells for the indicated transcripts in *FSCN1*<sup>+</sup>*CCR7*<sup>+</sup> DC, cDC2 and cDC1 populations.
